16 **ABSTRACT**

17

18 How distinct cell fates are manifested by direct lineage ancestry from bipotent progenitors, or by  
19 specification of individual cell types within a field of cells is a key question for understanding the  
20 emergence of tissues. The interplay between skeletal muscle progenitors and associated connective  
21 tissues cells provides a model for examining how muscle functional units are established. Most  
22 craniofacial structures originate from the vertebrate-specific neural crest cells except in the dorsal  
23 portion of the head, where they arise from cranial mesoderm. Here, using multiple lineage-traced single  
24 cell RNAseq, advanced computational methods and in situ analyses, we identify Myf5<sup>+</sup> bipotent  
25 progenitors that give rise to both muscle and juxtaposed connective tissue. Following this bifurcation,  
26 muscle and connective tissue cells retain complementary signalling features and maintain spatial  
27 proximity. Interruption of upstream myogenic identity shifts muscle progenitors to a connective tissue  
28 fate. Interestingly, Myf5-derived connective tissue cells, which adopt a novel regulatory signature, were  
29 not observed in ventral craniofacial structures that are colonised by neural crest cells. Therefore, we  
30 propose that an ancestral program gives rise to bifated muscle and connective tissue cells in skeletal  
31 muscles that are deprived of neural crest.

32

33

## 34 INTRODUCTION

35  
36 Stromal cells that are associated with skeletal muscles play critical roles in providing structural support  
37 and molecular cues (Biferali et al., 2019; Kardon et al., 2003; Sefton and Kardon, 2019). The majority  
38 of muscle-associated connective tissues in the head is derived from cranial neural crest cells (NCCs),  
39 an embryonic cell population that contributes to most of the structural components of the "new head", a  
40 vertebrate innovation (Douarin and Kalcheim, 1999; Gans and Northcutt, 1983; Grenier et al., 2009;  
41 Heude et al., 2018; Noden and Trainor, 2005). Recently, the extent of this contribution was redefined in  
42 muscles derived from cranial mesoderm, including extraocular (EOM), laryngeal and pharyngeal  
43 muscles (Comai et al., 2020; Grimaldi et al., 2015; Heude et al., 2018; Noden and Epstein, 2010).  
44 Interestingly, these muscles contain mesenchyme that is mesoderm-derived in their dorso-medial  
45 component, whereas the remaining muscle mass is embedded in mesenchyme that is neural crest-  
46 derived. It is unclear how the coordinated emergence of myogenic and connective tissues takes place  
47 during development, and how they establish long lasting paracrine communication.

48  
49 Along the trunk axis, paraxial somitic mesoderm gives rise to skeletal muscles and associated  
50 connective tissues (Burke and Nowicki, 2003). Upon signals emanating from the neural tube, notochord,  
51 ectoderm and lateral plate mesoderm, the dermomyotome (dorsal portion of the somite) undergoes an  
52 epithelial-to-mesenchymal transition and gives rise to several cell types including all skeletal muscles of  
53 the body, vasculature, tendons and bones (Ben-Yair and Kalcheim, 2008; Christ et al., 2007). Similarly,  
54 cranial mesodermal progenitors give rise to these diverse cell types yet, the unsegmented nature of  
55 head mesoderm raises the question of how spatiotemporal control of these cellular identities is  
56 established. Moreover, cardiopharyngeal mesoderm, which constitutes the major portion of cranial  
57 mesoderm, has cardiovascular potential, which manifests in the embryo as regions of clonally related  
58 cardiac and craniofacial skeletal muscles (Diogo et al., 2015; Swedlund and Lescroart, 2019). This  
59 skeletal muscle/cardiac branchpoint has been the subject of intense investigation in several model  
60 organisms including ascidians, avians, and mouse (Wang et al., 2019). However, the issue of connective  
61 tissue divergence from this or another lineage has not been addressed.

62  
63 Recently, advanced pipelines integrating scRNAseq data and modern algorithms have been  
64 instrumental for identifying new lineage relationships during development (Cao et al., 2019; He et al.,  
65 2020). Here, we employed unbiased and lineage-restricted single-cell transcriptomics using multiple  
66 transgenic mouse lines combined with new computational methods, in situ labelling and loss of  
67 function experiments, and show that bipotent progenitors expressing the muscle determination gene  
68 *Myf5* give rise to skeletal muscle and anatomically associated connective tissues. Notably, this  
69 property was restricted to muscles with partial contribution from NCCs, suggesting that in the absence  
70 of NCCs, cranial mesoderm acts as a source of connective tissue.

71  
72

## 73 RESULTS

74

### 75 **Myogenic and non-myogenic mesodermal populations coexist within distinct head lineages**

76 Somitic (*Pax3*-dependent) and cranial (*Tbx1/Pitx2*-dependent) mesoderm give rise to diverse cell types  
77 including those of the musculoskeletal system (Figure 1A). We first set out to explore the emergence of  
78 skeletal muscles and their associated mesodermal tissue within these programs. To that end, we  
79 employed a broad anterior mesoderm lineage-tracing strategy using *Mesp1<sup>Cre/+</sup>;R26<sup>mTmG/+</sup>* mouse  
80 embryos at E10.5 when craniofacial skeletal muscles are being established (Heude et al., 2018). The  
81 upper third (anterior to forelimb) of the embryos was dissected, the live GFP+ cells were isolated by  
82 FACS and processed for scRNAseq analysis (Figure S1A, C-D). After removal of doublets and lower  
83 quality cells (see Methods), a large portion of the cells obtained corresponded to adipogenic,  
84 chondrogenic, sclerotomal, endothelial, and cardiovascular cells (Figure 1B, Figure S2A-B). *Pax3*, *Pitx2*,  
85 *Tbx1*, *Myf5* and *Myod* expression distinguished clusters containing the cranial myogenic progenitors  
86 (Figure 1C, Figure S2A).

87

88 After subsetting these clusters, a few subclusters clearly separated based on their origin and anatomical  
89 location (Figure 1D-E, Figure S2C). Surprisingly, about half of the cells exhibited a connective tissue  
90 signature, including a strong bias towards *Prrx1*, a marker for lateral plate mesoderm (Durland et al.,  
91 2008), *Col1a1*, a major extracellular matrix component of connective cells (Micheli et al., 2020), and  
92 *Twist1*, previously reported to confer mesenchymal properties to cranial mesoderm (Bildsoe et al., 2016)  
93 (Figure 1F). Furthermore, the expression of *Pdgfra*, a well-defined marker of stromal cells (Farahani and  
94 Xaymardan, 2015), was robustly anticorrelated with the expression of its ligand *Pdgfa*, and associated  
95 with non-myogenic genes. Conversely, *Pdgfa* expression correlated with a myogenic cell state  
96 (Figure 1F, Figure S2D). Myogenic *Pdgfa* expression was shown to promote adjacent sclerotomal cells  
97 to adopt a rib cartilage fate (Tallquist et al., 2000). Therefore, this analysis identified anatomically distinct  
98 muscle and closely-associated connective tissue progenitors and highlights a potential PDGFR-  
99 mediated crosstalk between these 2 cells types.

100

### 101 **Transcriptional trajectories reveal a myogenic to non-myogenic cell state transition**

102 To understand the lineage relationship between myogenic and non-myogenic cells, we exploited the  
103 unspliced and spliced variants of our scRNAseq data, and computed the RNA velocity in each cell, using  
104 a recently described tool (Bergen et al., 2020) (Figure 2, Figure S3). RNA velocity interrogates the  
105 relative abundance of unspliced and spliced gene variants, which depends on the rates of transcription,  
106 degradation, and splicing to infer directional trajectories (Bergen et al., 2020; Manno et al., 2018). The  
107 cell cycle status constitutes a potential bias in scRNAseq data, especially when heterogeneous  
108 populations undergo cellular expansion, commitment and differentiation (McDavid et al., 2016). To  
109 eliminate this potential bias, cell cycle genes were consistently regressed out during preprocessing and  
110 directional trajectories were overlaid with cell cycle phase visualization for comparisons (Figure S3A,  
111 Methods). Notably, RNA velocity-inferred trajectories indicated that *Myf5*+ cells from the myogenic  
112 compartment contributed to non-myogenic cells (Figure 2A). These calculations were based on gene-

113 and cluster-specific dynamics, which yield higher accuracy than the initially described RNA velocity  
114 method, while providing quantitative metrics for quality control (Figure S3B and Methods).

115  
116 Another powerful feature of this method is the ability to infer “driver genes” that are responsible for most  
117 of the calculated RNA velocity, hence actively transcribed, or repressed (Bergen et al., 2020). Therefore,  
118 these genes can identify transitory states underlying cell fate decisions. We used this approach to  
119 uncover the driver genes that were responsible for the velocity found in anterior somites, as these cells  
120 displayed the most consistent directionality, and appeared to be independent of cell cycle (Figure 2B,  
121 Figure S3A-B, Table1). Top transcribed driver genes included *Foxp1* (Shao and Wei, 2018), *Meox2*  
122 (Noizet et al., 2016), *Meis1* (López-Delgado et al., 2020), *Twist2* (Franco et al., 2009), *Fap* (Puré and  
123 Blomberg, 2018), *Pdgfra* (Tallquist et al., 2000), *Prrx1* (Leavitt et al., 2020) and *Pcolce* (Bildsoe et al.,  
124 2016), that are associated with fibrosis and connective tissue development (Figure 2C). Interestingly,  
125 we noted that *Pdgfra* appeared as a driver gene and was activated along this inferred trajectory, whereas  
126 *Pdgfa* expression decreased rapidly (Figure 2D). Taken together, RNA velocity analysis for anterior  
127 somite mesodermal progenitors showed that *Myf5*<sup>+</sup>/*Pdgfa*<sup>+</sup> cells shifted towards a non-myogenic fate,  
128 by downregulating these 2 markers and activating *Pdgfra* expression (Figure 2E).

### 129 130 ***Myf5*-derived lineage contributes to connective tissue cells in the absence of neural crest**

131 Given that the number of cells examined in the EOM and pharyngeal arch mesodermal clusters from  
132 the E10.5 dataset was lower than for anterior somites, we decided to validate the relevance of *Myf5*-  
133 derived non-myogenic cells in these cranial regions directly in vivo. We thus examined the EOM, larynx  
134 and upper back muscles in the early fetus at E14.5 using a *Myf5*-lineage reporter mouse (*Myf5*<sup>Cre/+</sup>;  
135 *R26*<sup>TdTomato/+</sup>) combined with a contemporary reporter for *Pdgfra*<sup>+</sup> non-myogenic cells (*Pdgfra*<sup>H2BGFP/+</sup>)  
136 (Figure 3). Notably, we observed tdTom/H2BGFP double-positive cells in regions of EOM, laryngeal and  
137 upper back muscles that were partially or fully deprived of neural crest (Adachi et al., 2020; Comai et  
138 al., 2020; Heude et al., 2018) (Figure 3A-C'). Conversely, no double-positive cells were detected in  
139 muscles that are fully embedded in neural crest derived connective tissues such as mandibular and  
140 tongue muscles (Heude et al., 2018) (Figure 3D-E').

141 Mesenchymal tissue that is associated with the EOM arises from mesoderm in its most dorso-medial  
142 portion and from neural crest in its ventro-lateral portion (Comai et al., 2020). This dual origin makes it  
143 a prime candidate to explore the relative contribution of *Myf5*-derived cells to the associated connective  
144 tissues within a single functional unit. Using *Wnt1*<sup>Cre/+</sup>; *R26*<sup>mTmG/+</sup>; *Myf5*<sup>nlacZ/+</sup> (NCC tracing) and  
145 *Mesp1*<sup>Cre/+</sup>; *R26*<sup>mTmG/+</sup>; *Myf5*<sup>nlacZ/+</sup> (mesoderm tracing) at E13.5, we found that *Myf5*-expressing cells  
146 (assessed by β-gal expression) were exclusively in *Mesp1*-derived domains and absent from the *Wnt1*  
147 lineage (Figure 3F-I'). By E14.5, we observed a medio-lateral gradient of *Myf5*-lineage contribution to  
148 EOM associated connective tissues, and this was anticorrelated with the local contribution of neural  
149 crest cells to connective tissues (Figure 3J-K).

150

151 In agreement with our scRNAseq velocity analysis, these observations suggest that the mesodermal  
152 *Myf5*-lineage compensates for the lack of muscle-associated connective tissue in domains that are  
153 deprived of neural crest.

154

### 155 **Myf5-derived cells can maintain a molecular crosstalk following bifurcation in cell fate**

156 To investigate in more detail potential paracrine cell-cell communication between myogenic and non-  
157 myogenic cells, we examined their signalling complementarity together with their anatomical proximity.  
158 We first generated an E11.5 *Myf5*-lineage traced (*Myf5*<sup>Cre/+</sup>;*R26*<sup>mTmG/+</sup>) sc-RNAseq dataset (Figure S1A,  
159 E-F, Figure S3A, C) and focused on the EOM, which was clearly distinguished as an independent cluster  
160 based on the co-expression of several markers including *Pitx2* and *Alx4* (Bothe and Dietrich, 2006)  
161 (Figure 4A). Here, RNA velocity revealed strong myogenic/non-myogenic bi-directional cell-fate  
162 transitions (Figure 4B). In agreement with the E10.5 mesodermal sc-RNAseq dataset, EOM progenitors  
163 presented a strong dichotomy in *Pdgfa* and *Pdgfra* expression between myogenic and non-myogenic  
164 cells, respectively. To confirm if the potential crosstalk between these clusters is maintained at later  
165 stages of EOM development, we interrogated the anatomical proximity of these cells by performing  
166 single molecule fluorescent in situ hybridization (RNAscope) for *Pdgfa* and *Pdgfra* on E14.5 lineage-  
167 traced *Myf5*<sup>Cre/+</sup>;*R26*<sup>mTmG/+</sup> fetuses (Figure 4C-D'). In accordance with the scRNAseq analysis, we  
168 observed a complementary pattern of expression of *Pdgfa* (membrane GFP+) and *Pdgfra* (membrane  
169 GFP-) transcripts (Figure 4C-D').

170

171 Gene set enrichment analysis of EOM myogenic and non-myogenic driver genes revealed that  
172 transmembrane receptor protein kinase and SMAD activity were shared terms between the 2 clusters,  
173 indicating that specific complementary signalling networks could be actively maintained between these  
174 two populations (Figure S4A). Therefore, we examined the dynamic induction of tyrosine kinase ligands  
175 and receptors in the EOM. As observed in the scRNAseq dataset of anterior somites (Figure 2) and by  
176 RNAscope on tissue sections at the EOM level (Figure 4C-D'), *Pdgfra* expression was actively induced  
177 in non-myogenic *Myf5*-derived cells while *Pdgfa* expression was found in myogenic cells (Figure 4E-F).  
178 Notably, two additional tyrosine kinase receptors, namely *Bmpr1b* and *Ephb1*, were found to be among  
179 the top 100 driver genes of the myogenic EOM compartment, indicating that myogenic commitment is  
180 associated with upregulation of these receptors in the EOM (Figure 4F, Table1). Strikingly, two of their  
181 respective ligands *Bmp4* and *Efnb1*, were found to be specifically expressed in non-myogenic cells  
182 (Figure 4E). These results favor a model where complementary paracrine signalling networks operates  
183 between myogenic and non-myogenic *Myf5*-derived cells (Figure 4G), while their cellular juxtaposition  
184 is maintained through fetal stages.

185

### 186 **Obstructing myogenesis expands connective tissue formation from bipotent cells**

187 The directional trajectories identified by RNA velocity in the EOM at E11.5 showed a strong bipolarity in  
188 fate with a higher velocity confidence index at each end of the myogenic and non-myogenic domains,  
189 and lower at their interface (Figure S4B). This suggests that the anticipated cell fate is bipotential before  
190 cell fate bifurcation. Conversely, cells that were located on either side of this central region were

191 identified with greater confidence as committed either to a myogenic or a non-myogenic fate (Figure  
192 S4B). To identify the regulatory factors underlying this bipotency, we used SCENIC, a regulatory network  
193 inference algorithm (Aibar et al., 2017). This tool allows regrouping of sets of correlated genes into  
194 regulons (i.e. a transcription factor and its targets) based on binding motifs and co-expression. Use of  
195 this pipeline significantly reduced the number of variables from thousands of genes to a few hundred  
196 regulatory modules, while preserving the general aspect of the data, particularly the bipartite distribution  
197 of myogenic and non-myogenic cells (Figure 5A). The top regulons of this analysis revealed active  
198 transcription factors underlying myogenic and non-myogenic cell fates in the EOM at E11.5. Notably,  
199 *Myf5*, *Pitx1*, *Mef2a* and *Six1*, transcription factors known to be implicated in myogenic development  
200 (Buckingham and Rigby, 2014), appeared among the top regulons in myogenic cells whereas *Fli1*, *Ebf1*,  
201 *Ets1*, *Foxc1*, *Meis1* and *Six2*, genes known for their involvement in adipogenic, vascular, mesenchymal  
202 and tendon development (Jimenez et al., 2006; López-Delgado et al., 2020; Noizet et al., 2016; Truong  
203 and Ben-David, 2000; Whitesell et al., 2019; Yamamoto-Shiraishi and Kuroiwa, 2013), constituted some  
204 of the highly active non-myogenic transcription factors (Figure 5B). Given that *Myf5* appeared as a top  
205 regulatory factor of the myogenic program, we interrogated the fate of *Myf5*-expressing progenitors in a  
206 *Myf5<sup>nlacZ/nlacZ</sup>* null genetic background. Interestingly, some  $\beta$ -gal<sup>+</sup> cells were found in the cartilage  
207 primordium (Sox9<sup>+</sup>) of the EOM in the heterozygous control at E12.5 indicating that cells with recent  
208 *Myf5* activity diverged to a non-myogenic fate (Figure 5C-C'). As previously reported, the extraocular  
209 muscles are absent in this mutant (Figure 5D, asterisk) (Sambasivan et al., 2009). Notably, disruption  
210 of *Myf5* activity led to a 3-fold increase in the proportion of non-myogenic *Myf5*-derived cells in this  
211 region (Figure 5E). In contrast, no double-positive cells were found in the masseter, a muscle fully  
212 embedded in neural crest, even in the absence of *Myf5* (Figure 5E). Robust *Myf5* expression is thus  
213 necessary to maintain a balance between myogenic and non-myogenic cell fates of *Myf5*<sup>+</sup> bipotent  
214 progenitors only in neural crest-depleted regions. Conversely, virtually no *Pdgfra*<sup>+</sup> cells were found to  
215 be derived from *Myod* expressing cells in most muscles of *Myod<sup>lCre</sup>;R26<sup>TdTomato/+</sup>;Pdgfra<sup>H2BGFP/+</sup>* fetuses  
216 at E14.5, and only rare double positive cells were found in the EOM (Figure S5). This observation  
217 indicates that bipotency is associated with *Myf5*, and that subsequent activation of *Myod* within this  
218 lineage locks cell fate into the myogenic program thereby suppressing their connective tissue potential  
219 (Figure 5F).

220

### 221 **Myf5-derived contribution to connective tissues is sustained through muscle initiation**

222 Although we identified *Myf5*-derived non-myogenic cells in various regions of the embryo, it was not  
223 clear if this population was self-sustaining, or continuously generated throughout development. To  
224 address this issue, we performed 2 more scRNAseq experiments at E12.5 and E14.5, using  
225 contemporary *Myf5* labelling (*Myf5<sup>GFP-P/+</sup>*; Figures 6, S1B, G-J, S3A, D-E). In accordance with the earlier  
226 datasets, cells that appeared to belong to muscle anlagen of EOM, somites and caudal arches  
227 progressed towards a non-myogenic state (Figure 6A-C'). To assess the identity of these cells, we  
228 performed a gene set enrichment network analysis combining the differentially expressed genes of non-  
229 myogenic clusters of all stages. We found that all stages contributed equally to "GO Molecular Function"  
230 and "Reactome pathways" terms in spite of their relatively diverse gene expression signatures (Figure

231 S6). This finding suggests that these non-myogenic cells are relatively homogeneous in gene signatures  
232 throughout cranial muscles when they emerge from common bipotent progenitors. Highly significant  
233 terms hinted at a myogenic-supporting role, providing muscle progenitors with extracellular matrix  
234 components, and contributing to neuronal guidance (Figure 6E). Among these terms, presence of Pdgf  
235 signalling and receptor kinase activity indicated, once again, that the interactions found in the EOM  
236 could occur also at later stages in various craniofacial muscles that are deprived of neural crest derived  
237 connective tissue.

238

### 239 **A novel regulatory network underlies the non-myogenic cell fate**

240 Myf5+ bipotent progenitors were observed at multiple stages and anatomical locations, and they yielded  
241 a relatively homogeneous population expressing common markers associated with extracellular matrix  
242 components, cell adhesion molecules, and tyrosine kinase signalling. To assess whether the regulatory  
243 mechanisms guiding this transition are distinct in different locations in the head, we set out to explore  
244 the common molecular switches underlying cell fate decisions. To do so, we developed a pipeline where  
245 we combined the list of driver genes at the start of the non-myogenic trajectory (Table 1) with the most  
246 active regulons in the non-myogenic region (Methods, code in open access). This resulted in a network  
247 consisting of the most active transcription factors and the most transcriptionally dynamic genes found  
248 at the non-myogenic branchpoint. We performed this operation for each dataset independently and  
249 displayed them as individual networks (Figure 7A-D). Finally, we overlapped the list of these “driver  
250 regulators” to identify the common transcription factors guiding the non-myogenic cell fate decision  
251 (Figure 7E). Notably, *Foxp2*, *Hmga2*, *Meis1*, *Meox2* and *Tcf7l2* were identified in all 4 datasets as key  
252 driver regulators, and thus are likely to play significant role in the non-myogenic transition (Figure 7E,  
253 Table 2).

254

255 Interestingly, Tcfs and Lef1 were among these top common regulators and they form a complex effector  
256 for the canonical Wnt pathway. Previous work showed that during cranial myogenesis, neural crest cells  
257 release inhibitors of the Wnt pathway to promote myogenesis (Tzahor et al., 2003). It is thus tempting  
258 to speculate that in the absence of neural crest, mesoderm-derived bipotent progenitors can give rise  
259 to connective tissue by maintaining canonical Wnt activity. To assess this hypothesis, we examined the  
260 expression of *Axin2*, a common readout for Wnt/ $\beta$ -cat activity (Babb et al., 2017; Moosdijk et al., 2020).  
261 Interestingly, *Axin2* levels were elevated in the non-myogenic portion of all the different datasets (Figure  
262 7F-I). Additionally, *Dkk2*, which has been described as an activator of Wnt/ $\beta$ -cat pathway in the neural  
263 crest (Devotta et al., 2018), was also found to be elevated, indicative of a putative positive-feedback  
264 loop mechanism supporting the maintenance of this population.

265



## 266 DISCUSSION

267  
268 Distinct fates can emerge through the specification of individual cell types, or through direct lineage  
269 ancestry from bipotent or multipotent cells. Here we addressed this issue in the context of the  
270 emergence of myogenic and associated connective tissue cells during the formation of craniofacial  
271 muscles. By combining state-of-the-art analytical methods, we identified the transcriptional dynamics, the  
272 intercellular communication networks, and the regulators controlling the balance between two  
273 complementary cell fates. Specifically, our work provides evidence for a novel mesoderm-derived  
274 bipotent cell population that gives rise to muscle and associated connective tissue cells  
275 spatiotemporally, and only in regions deprived of neural crest cells (Figure S7).

276  
277 Brown adipocytes, neurons, pericytes and rib cartilage have been reported to express *Myf5* in ancestral  
278 cells (Daubas et al., 2000; Haldar et al., 2008; Sebo et al., 2018; Stuelsatz et al., 2014). Interestingly,  
279 when *Myf5* expression is disrupted, cells can acquire non-myogenic fates and contribute to connective  
280 tissue (this study), cartilage, and dermis (Tajbakhsh et al., 1996). These studies suggest that *Myf5*-  
281 expression alone is not sufficient to promote robust myogenic fate in multiple regions of developing  
282 embryos. Consistent with these observations, *Myod*<sup>+</sup> cells do not contribute to rib cartilage (Wood et  
283 al., 2020) and only give rise to very few connective tissue cells in the periocular region (this study).  
284 These findings are also consistent with the higher chromatin-remodelling capacity of *Myod* compared to  
285 *Myf5*, and its role as defining the committed myogenic cell state (Conerly et al., 2016; Tapscott, 2005).  
286 In contrast to a previous study (Stuelsatz et al., 2014), we found no neural-crest derived cells expressing  
287 *Myf5* during EOM tissueogenesis at E13.5 (using *Wnt1*<sup>Cre/+</sup>;*R26*<sup>mTmG/+</sup>;*Myf5*<sup>nlacZ/+</sup>). We note that *Myf5*-  
288 expressing cells contribute to non-myogenic cells from early embryonic stages (E10.5) and continue to  
289 do so in the fetus, indicating that these bipotent cells persist well after muscles are established.

290  
291 Here, we also identified a core set of transcription factors specifically active in the non-myogenic cells  
292 across all datasets. We propose that these genes guide bipotent cells to a non-myogenic fate and thus  
293 confer mesenchymal properties to non-committed progenitors. Recent studies have identified  
294 anatomically distinct fibroblastic populations using single-cell transcriptomics, yet unique markers could  
295 not be identified (Muhl et al., 2020; Sacchetti et al., 2016), making characterisation of cell subtypes  
296 challenging. *Tcf4/Tcf7l2* was identified as a master regulator of fibroblastic fate during muscle-  
297 associated connective tissue development although it is also expressed in myogenic progenitors at  
298 lower levels (Kardon et al., 2003; Mathew et al., 2011; Sefton and Kardon, 2019). We also report that  
299 this gene is one of the main regulators of connective tissue fate. Other transcription factors have been  
300 linked to skin fibroblast fates including *Tcf4*, *Six2*, *Meox2*, *Egr2* and *Foxs1*, and their repression favours  
301 a myofibroblastic potential (Noizet et al., 2016). *Six2* and *Meox2* were also identified in our analysis,  
302 which raises the question of the shared genetic programs between myofibroblastic cells and fibroblastic  
303 cells derived from progenitors primed for myogenesis during development.

304

305 Interestingly, *Prrx1*, a marker for lateral plate mesoderm (Durland et al., 2008), was differentially  
306 expressed in the connective tissue population at various stages. Although lateral plate mesoderm is  
307 identifiable in the trunk, its anterior boundaries in the head are unclear (Prummel et al., 2020). More  
308 detailed analyses of *Prrx1*, *Isl1* and *Myf5* lineages need to be carried out to delineate the specific  
309 boundaries of each progenitor contribution to cranial connective tissue.

310  
311 Tyrosine kinase receptors have been implicated in a number of developmental programs for both muscle  
312 and associated connective tissues (Arnold et al., 2020; Knight and Kothary, 2011; Olson and Soriano,  
313 2009; Tallquist et al., 2000; Tzahor et al., 2003; Vinagre et al., 2010). For example, the differentiation of  
314 fetal myoblasts is inhibited by growth factors Tgf $\beta$  and Bmp4 (Cossu et al., 2000). Epha7 signalling is  
315 expressed in embryonic and adult myocytes and promotes their differentiation (Arnold et al., 2020).  
316 Significantly, we noticed a striking and lasting complementary expression of *Pdgfa* and *Pdgfra*  
317 throughout embryonic stages, in the myogenic and non-myogenic progenitors respectively. Pdgf ligands  
318 emanating from hypaxial myogenic cells under the control of *Myf5* were shown to be necessary for rib  
319 cartilage development (Tallquist et al., 2000; Vinagre et al., 2010). Additionally, *Pdgfra* promotes  
320 expansion of fibroblasts during fibrosis (Olson and Soriano, 2009). Interestingly, we found that *Pdgfa*  
321 expression was reduced in cells expressing high levels of *Myog* at the fetal stage (data not shown).  
322 Therefore, *Myf5*-derived myogenic progenitor cells might guide non-myogenic *Myf5*-derived expansion,  
323 which in turn provides ligands and extracellular matrix components to favour myogenic development  
324 and patterning. Moreover, unlike trunk myogenesis, cranial muscle development relies on the  
325 expression of Wnt and Bmp inhibitors from surrounding tissues (Tzahor et al., 2003). Interestingly, we  
326 showed that the *Myf5*-derived non-myogenic cells express Bmp4, Dkk2, and Axin2. Additionally, we  
327 showed that the Wnt effector complex Tcf/Lef is active in these cells. It is thus likely that these cells  
328 maintain their non-myogenic fate by promoting Bmp production and Wnt activity cell-autonomously.  
329 Further studies could provide further insights into the evolutionary ancestry of this bipotency by studying  
330 other model organisms devoid of neural crest.

331

## 332 MATERIALS & METHODS

333

### 334 scRNAseq data generation

335 For E10.5 to E12.5 embryos, the cranial region above the forelimb was dissected in ice-cold 3% FBS in  
336 PBS and mechanically dissociated with forceps and pipetting. The same procedure was applied at E14.5  
337 but the dissection was refined to the pharyngeal and laryngeal regions. Tissues were then digested in  
338 TrypLE (ThermoFisher Cat #: 12604013) during 3 rounds of 5-min incubation (37°C, 1400 RPM),  
339 interspersed with gentle pipetting to further dissociate the tissue. Cells were resuspended in FBS 3%,  
340 filtered, and incubated with Calcein Blue (eBioscience, Cat #: 65-0855-39) and Propidium Iodide  
341 (ThermoFisher Cat #: P1304MP) to check for viability. Viable cells were sorted on BD FACSAria™ III  
342 and manually counted using a hemocytometer. RNA integrity was assessed with Agilent Bioanalyzer  
343 2100 to validate the isolation protocol prior to scRNAseq (RIN>8 was considered acceptable). 4000 to  
344 13000 cells were loaded onto 10X Genomics Chromium microfluidic chip and cDNA libraries were

345 generated following manufacturer's protocol. Concentrations and fragment sizes were measured using  
346 Agilent Bioanalyzer and Invitrogen Qubit. cDNA libraries were sequenced using NextSeq 500 and High  
347 Output v2.5 (75 cycles) kits. Genome mapping and count matrix generation were done following 10X  
348 Genomics Cell Ranger pipeline.

349

### 350 **RNA velocity and driver genes**

351 RNA velocity analyses were performed using scvelo (Bergen et al., 2020) in python. This tool allows  
352 inferring velocity flow and driver genes using scRNAseq data, with major improvements from previous  
353 methods (Manno et al., 2018). First, unspliced and spliced transcript matrices were generated using  
354 velocity (Manno et al., 2018) command line function, which outputs unspliced, spliced, and ambiguous  
355 matrices as a single loom file. These files were combined with filtered Seurat objects to yield objects  
356 with unspliced and spliced matrices, as well as Seurat-generated annotations and cell-embeddings  
357 (UMAP, tSNE, PCA). These datasets were then processed following scvelo online guide and  
358 documentation. Velocity was calculated based on the dynamical model (using  
359 `scv.tl.recover_dynamics(adata)`, and `scv.tl.velocity(adata, mode='dynamical')`) and when outliers were  
360 detected, differential kinetics based on top driver genes were calculated and added to the model (using  
361 `scv.tl.velocity(adata, diff_kinetics=True)`). Specific driver genes were identified by determining the top  
362 likelihood genes in the selected cluster. The lists of top 100 drivers for each stage are given in Table1.

363

### 364 **Seurat preprocessing**

365 scRNAseq datasets were preprocessed using Seurat in R (<https://satijalab.org/seurat/>) (Butler et al.,  
366 2018). Cells with more than 20% of mitochondrial gene fraction were discarded. The number of genes  
367 expressed averaged to 4000 in all 4 datasets. Dimension reduction and UMAP generation were  
368 performed following Seurat workflow. Doublets were inferred using DoubletFinder v3 (McGinnis et al.,  
369 2019). Cell cycle genes, mitochondrial fraction, number of genes, number of UMI were regressed in all  
370 datasets following Seurat dedicated vignette. We noticed that cell cycle regression, although clarifying  
371 anatomical diversity, seemed to induce low and high UMI clustering (Figure S1E-F). For the E10.5 and  
372 E11.5 datasets, 2 replicates were generated from littermates and merged after confirming their  
373 similitude. For subsequent datasets (E12.5 and E14.5), no replicates were used. Annotation and  
374 subsetting were also performed in Seurat. "Myogenic" and "Non-myogenic" annotations were based on  
375 *Pdgfa* and *Pdgfra* expression and myogenic genes *Myf5*, *Myod*, and *Myog*. Cells not expressing *Pdgfa*  
376 were annotated as "non-myogenic" unless they express myogenic genes. Cells expressing *Pdgfa* were  
377 annotated as "myogenic". We noticed that at later stages, *Pdgfa* expression decreases in Myog+ cells.  
378 Thus, driver genes of connective tissue at E12.5 and E14.5 were determined using cluster annotations  
379 obtained from Leiden-based clustering.

380

### 381 **Gene regulatory network inference**

382 Gene regulatory networks were inferred using SCENIC (R implementation) (Aibar et al., 2017) and  
383 pySCENIC (python implementation) (Sande et al., 2020). This algorithm allows regrouping of sets of  
384 correlated genes into regulons (i.e. a transcription factor and its targets) based on motif binding and co-

385 expression. UMAP and heatmap were generated using regulon AUC matrix (Area Under Curve) which  
386 refers to the activity level of each regulon in each cell.

387

### 388 **Driver regulons**

389 Results from SCENIC and scvelo were combined to identify regulons that could be responsible for the  
390 transcriptomic induction of driver genes. Similar to the steps mentioned above, SCENIC lists of regulons  
391 were used to infer connections between transcription factors and driver gene. Networks were generated  
392 as explained above, and annotated with “Active regulon” or “driver gene”. The lists of individual driver  
393 regulons of each dataset were then combined and the most recurring driver regulons were identified.  
394 The code is available at this address: <https://github.com/TajbakhshLab/DriverRegulators>

395

### 396 **Gene set enrichment analysis**

397 Gene set enrichment analyses were performed on either the top markers (obtained from Seurat function  
398 FindAllMarkers) or from driver genes (obtained from scvelo), using Cluego (Bindea et al., 2009). “GO  
399 Molecular Pathway”, “GO Biological Process” and “Reactome pathways” were used independently to  
400 identify common and unique pathways involved in each dataset. In all analyses, an enrichment/depletion  
401 two-sided hypergeometric test was performed and p-values were corrected using the Bonferroni step  
402 down method.

403

### 404 **Mouse strains**

405 Animals were handled according to European Community guidelines and the ethics committee of the  
406 Institut Pasteur (CETEA) approved protocols. The following strains were previously described: *Myf5<sup>Cre</sup>*  
407 (Haldar et al., 2008), *Mesp1<sup>Cre</sup>* (Saga et al., 1999), *Tg:Wnt1Cre* (Danielian et al., 1998), *R26<sup>TdTom</sup>*  
408 (*Ai9*; (Madisen et al., 2009)), *R26<sup>mTmG</sup>* (Muzumdar et al., 2007), *Myf5<sup>nlacZ</sup>* (Tajbakhsh et al., 1996),  
409 *Pdgfra<sup>H2BGFP</sup>* (Hamilton et al., 2003) and *Myf5<sup>GFP-P</sup>* (Kassar-Duchossoy et al., 2004). To generate  
410 *Myf5<sup>Cre/+</sup>;R26<sup>TdTomato/+</sup>;Pdgfra<sup>H2BGFP/+</sup>* embryos, *Myf5<sup>Cre/+</sup>* females were crossed with  
411 *Pdgfra<sup>H2BGFP/+</sup>;R26<sup>TdTomato/TdTomato</sup>* males. Mice were kept on a mixed genetic background C57BL/6JRj  
412 and DBA/2JRj (B6D2F1, Janvier Labs). Mouse embryos and fetuses were collected between embryonic  
413 day (E) E10.5 and E14.5, with noon on the day of the vaginal plug considered as E0.5.

414

### 415 **Immunofluorescence**

416 Collected embryonic and adult tissues were fixed 2.5h in 4% paraformaldehyde (Electron Microscopy  
417 Sciences, Cat #:15710) in PBS with 0,2-0,5% Triton X-100 (according to their stage) at 4°C and washed  
418 overnight at 4°C in PBS. In preparation for cryosectioning, embryos were equilibrated in 30% sucrose  
419 in PBS overnight at 4°C and embedded in OCT. Cryosections (16-20µm) were left to dry at RT for 30  
420 min and washed in PBS. The primary antibodies used in this study are chicken polyclonal anti-β-gal  
421 (Abcam, Cat #: ab9361, dilution 1:1000), mouse monoclonal IgG1, mouse monoclonal IgG1 anti-Myod  
422 (BD Biosciences, Cat# 554130, dilution 1:100), mouse monoclonal IgG1 anti-Pax7 (DSHB, Cat. #: AB\_528428,  
423 dilution 1:20), rabbit anti-mouse Sox9 (Millipore, Cat. #: AB5535, dilution 1/2000), rabbit  
424 polyclonal anti-Tomato (Clontech Cat. #: 632496, dilution 1:400) and chicken polyclonal anti-GFP

425 (Abcam Cat. #: 13970, dilution 1:1000). Images were acquired using Zeiss LSM780 or LSM700 confocal  
426 microscopes and processed using ZEN software (Carl Zeiss).

427

#### 428 **RNAscope in situ hybridization**

429 Embryos for in situ hybridization were fixed overnight in 4% PFA. Embryos were equilibrated in 30%  
430 sucrose in PBS and sectioned as described for immunofluorescence. RNAscope probes Mm-Pdgfa  
431 (411361) and Mm-Pdgfra (480661-C2) were purchased from Advanced Cell Diagnostics, Inc. In situ  
432 hybridization was performed using the RNAscope Multiplex Fluorescent Reagent Kit V2 as described  
433 previously (Comai et al., 2019).

434

#### 435 **Data Availability**

436 The data that support the findings of this study are available from the corresponding author, S.T, upon  
437 request. The code that was used to generate the driver regulators is available at this address:

438 <https://github.com/TajbakhshLab/DriverRegulators>

439

#### 440 **Acknowledgements**

441 We acknowledge funding support from the Institut Pasteur, Association Française contre le Myopathies,  
442 Agence Nationale de la Recherche (Laboratoire d'Excellence Revive, Investissement d'Avenir; ANR-  
443 10-LABX-73) and MyoHead, Association Française contre les Myopathies (Grant #20510), Fondation  
444 pour la Recherche Médicale (Grant # FDT201904008277), and the Centre National de la Recherche  
445 Scientifique. We gratefully acknowledge the UtechS Photonic BioImaging, C2RT, Institut Pasteur,  
446 supported by the French National Research Agency (France BioImaging; ANR-10-INSB-04;  
447 Investments for the Future).

448

#### 449 **Competing interests**

450 The authors declare no competing interests.

451

#### 452 **REFERENCES:**

453

454

455 **Adachi, N., Bilio, M., Baldini, A. and Kelly, R. G.** (2020). Cardiopharyngeal mesoderm origins of  
456 musculoskeletal and connective tissues in the mammalian pharynx. *Development* **147**, dev185256.

457 **Aibar, S., González-Blas, C. B., Moerman, T., Huynh-Thu, V. A. A., Imrichova, H., Hulselmans, G.,**  
458 **Rambow, F., Marine, J.-C. C., Geurts, P., Aerts, J., et al.** (2017). SCENIC: single-cell regulatory network  
459 inference and clustering. *Nature methods* **14**, 1083–1086.

460 **Arnold, L. L., Cecchini, A., Stark, D. A., Ihnat, J., Craig, R. N., Carter, A., Zino, S. and Cornelison, D.**  
461 (2020). EphA7 promotes myogenic differentiation via cell-cell contact. *Elife* **9**, e53689.

462 **Babb, R., Chandrasekaran, D., Neves, V. C. M. and Sharpe, P. T.** (2017). Axin2-expressing cells  
463 differentiate into reparative odontoblasts via autocrine Wnt/ $\beta$ -catenin signaling in response to tooth damage.  
464 *Sci Rep-uk* **7**, 3102.

- 465 **Ben-Yair, R. and Kalcheim, C.** (2008). Notch and bone morphogenetic protein differentially act on  
466 dermomyotome cells to generate endothelium, smooth, and striated muscle. *J Cell Biol* **180**, 607–618.
- 467 **Bergen, V., Lange, M., Peidli, S., Wolf, F. A. and Theis, F. J.** (2020). Generalizing RNA velocity to transient  
468 cell states through dynamical modeling. *Nat Biotechnol* 1–7.
- 469 **Biferali, B., Proietti, D., Mozzetta, C. and Madaro, L.** (2019). Fibro–Adipogenic Progenitors Cross-Talk in  
470 Skeletal Muscle: The Social Network. *Front Physiol* **10**, 1074.
- 471 **Bildsoe, H., Fan, X., Wilkie, E. E., Ashoti, A., Jones, V. J., Power, M., Qin, J., Wang, J., Tam, P. P. L. and**  
472 **Loebel, D. A. F.** (2016). Transcriptional targets of TWIST1 in the cranial mesoderm regulate cell-matrix  
473 interactions and mesenchyme maintenance. *Dev Biol* **418**, 189–203.
- 474 **Bindea, G., Mlecnik, B., Hackl, H., Charoentong, P., Tosolini, M., Kirilovsky, A., Fridman, W.-H., Pagès,**  
475 **F., Trajanoski, Z. and Galon, J.** (2009). ClueGO: a Cytoscape plug-in to decipher functionally grouped  
476 gene ontology and pathway annotation networks. *Bioinformatics* **25**, 1091–1093.
- 477 **Bothe, I. and Dietrich, S.** (2006). The molecular setup of the avian head mesoderm and its implication for  
478 craniofacial myogenesis. *Developmental Dynamics* **235**, 2845–2860.
- 479 **Buckingham, M. and Rigby, P. W. J.** (2014). Gene Regulatory Networks and Transcriptional Mechanisms that  
480 Control Myogenesis. *Dev Cell* **28**, 225–238.
- 481 **Burke, A. C. and Nowicki, J. L.** (2003). A New View of Patterning Domains in the Vertebrate Mesoderm. *Dev*  
482 *Cell* **4**, 159–165.
- 483 **Butler, A., Hoffman, P., Smibert, P., Papalex, E. and Satija, R.** (2018). Integrating single-cell transcriptomic  
484 data across different conditions, technologies, and species. *Nat Biotechnol* **36**, 411–420.
- 485 **Cao, J., Spielmann, M., Qiu, X., Huang, X., Ibrahim, D. M., Hill, A. J., Zhang, F., Mundlos, S.,**  
486 **Christiansen, L., Steemers, F. J., et al.** (2019). The single-cell transcriptional landscape of mammalian  
487 organogenesis. *Nature* **566**, 496–502.
- 488 **Christ, B., Huang, R. and Scaal, M.** (2007). Amniote somite derivatives. *Dev Dynam* **236**, 2382–2396.
- 489 **Comai, G., Heude, E., Mella, S., Paisant, S., Pala, F., Gallardo, M., Langa, F., Kardon, G.,**  
490 **Gopalakrishnan, S. and Tajbakhsh, S.** (2019). A distinct cardiopharyngeal mesoderm genetic hierarchy  
491 establishes antero-posterior patterning of esophagus striated muscle. *Elife* **8**, e47460.
- 492 **Comai, G. E., Tesařová, M., Dupé, V., Rhinn, M., Vallecillo-García, P., Silva, F. da, Feret, B., Exelby, K.,**  
493 **Dollé, P., Carlsson, L., et al.** (2020). Local retinoic acid signaling directs emergence of the extraocular  
494 muscle functional unit. *Plos Biol* **18**, e3000902.
- 495 **Conerly, M. L., Yao, Z., Zhong, J. W., Groudine, M. and Tapscott, S. J.** (2016). Distinct Activities of Myf5  
496 and MyoD Indicate Separate Roles in Skeletal Muscle Lineage Specification and Differentiation. *Dev Cell*  
497 **36**, 375–85.
- 498 **Danielian, P. S., Muccino, D., Rowitch, D. H., Michael, S. K. and McMahon, A. P.** (1998). Modification of  
499 gene activity in mouse embryos in utero by a tamoxifen-inducible form of Cre recombinase. *Curr Biol* **8**,  
500 1323–S2.
- 501 **Daubas, P., Tajbakhsh, S., Hadchouel, J., Primig, M. and Buckingham, M.** (2000). Myf5 is a novel early  
502 axonal marker in the mouse brain and is subjected to post-transcriptional regulation in neurons. *Dev Camb*  
503 *Engl* **127**, 319–31.
- 504 **Devotta, A., Hong, C.-S. and Saint-Jeannet, J.-P.** (2018). Dkk2 promotes neural crest specification by  
505 activating Wnt/ $\beta$ -catenin signaling in a GSK3 $\beta$  independent manner. *Elife* **7**, e34404.

- 506 **Diogo, R., Kelly, R. G., Christiaen, L., Levine, M., Ziermann, J. M., Molnar, J. L., Noden, D. M. and**  
507 **Tzahor, E.** (2015). A new heart for a new head in vertebrate cardiopharyngeal evolution. *Nature* **520**, 466–  
508 73.
- 509 **Douarin, N. L. and Kalcheim, C.** (1999). *The Neural Crest*. 2nd ed., Developmental and Cell Biology Series.  
510 Cambridge University Press.
- 511 **Durland, J. L., Sferlazzo, M., Logan, M. and Burke, A. C.** (2008). Visualizing the lateral somitic frontier in  
512 the Prx1Cre transgenic mouse. *J Anat* **212**, 590–602.
- 513 **Farahani, R. M. and Xaymardan, M.** (2015). Platelet-Derived Growth Factor Receptor Alpha as a Marker of  
514 Mesenchymal Stem Cells in Development and Stem Cell Biology. *Stem Cells Int* **2015**, 362753.
- 515 **Franco, H., Casasnovas, J. J. and Cadilla, C. L.** (2009). Periostin gene expression is regulated by the bHLH  
516 transcription factor TWIST2 in human skin fibroblasts. *Faseb J* **23**, 660.11-660.11.
- 517 **Gans, C. and Northcutt, R. G.** (1983). Neural Crest and the Origin of Vertebrates: A New Head. *Science* **220**,  
518 268–273.
- 519 **Grenier, J., Teillet, M.-A., Grifone, R., Kelly, R. G. and Duprez, D.** (2009). Relationship between neural  
520 crest cells and cranial mesoderm during head muscle development. *Plos One* **4**, e4381.
- 521 **Grimaldi, A., Parada, C. and Chai, Y.** (2015). A Comprehensive Study of Soft Palate Development in Mice.  
522 *PloS one* **10**, e0145018.
- 523 **Haldar, M., Karan, G., Tvrdik, P. and Capecchi, M. R.** (2008). Two cell lineages, myf5 and myf5-  
524 independent, participate in mouse skeletal myogenesis. *Dev Cell* **14**, 437–45.
- 525 **Hamilton, T. G., Klinghoffer, R. A., Corrin, P. D. and Soriano, P.** (2003). Evolutionary Divergence of  
526 Platelet-Derived Growth Factor Alpha Receptor Signaling Mechanisms. *Mol Cell Biol* **23**, 4013–4025.
- 527 **He, P., Williams, B. A., Trout, D., Marinov, G. K., Amrhein, H., Berghella, L., Goh, S.-T., Plajzer-Frick,**  
528 **I., Afzal, V., Pennacchio, L. A., et al.** (2020). The changing mouse embryo transcriptome at whole tissue  
529 and single-cell resolution. *Nature* **583**, 760–767.
- 530 **Heude, E., Tesarova, M., Sefton, E. M., Jullian, E., Adachi, N., Grimaldi, A., Zikmund, T., Kaiser, J.,**  
531 **Kardon, G., Kelly, R. G., et al.** (2018). Unique morphogenetic signatures define mammalian neck muscles  
532 and associated connective tissues. *eLife* **7**,
- 533 **Jimenez, M. A., Åkerblad, P., Sigvardsson, M. and Rosen, E. D.** (2006). Critical Role for Ebf1 and Ebf2 in  
534 the Adipogenic Transcriptional Cascade  $\nabla \dagger$ . *Mol Cell Biol* **27**, 743–757.
- 535 **Kardon, G., Harfe, B. D. and Tabin, C. J.** (2003). A Tcf4-Positive Mesodermal Population Provides a  
536 Prepattern for Vertebrate Limb Muscle Patterning. *Dev Cell* **5**, 937–944.
- 537 **Kassar-Duchossoy, L., Gayraud-Morel, B., Gomès, D., Rocancourt, D., Buckingham, M., Shinin, V. and**  
538 **Tajbakhsh, S.** (2004). Mrf4 determines skeletal muscle identity in Myf5:Myod double-mutant mice. *Nature*  
539 **431**, 466–471.
- 540 **Knight, J. D. and Kothary, R.** (2011). The myogenic kinome: protein kinases critical to mammalian skeletal  
541 myogenesis. *Skelet Muscle* **1**, 29.
- 542 **Leavitt, T., Hu, M. S., Borrelli, M. R., Januszyk, M., Garcia, J. T., Ransom, R. C., Mascharak, S.,**  
543 **desJardins-Park, H. E., Litzenburger, U. M., Walmsley, G. G., et al.** (2020). Prrx1 Fibroblasts Represent  
544 a Pro-fibrotic Lineage in the Mouse Ventral Dermis. *Cell Reports* **33**, 108356.

- 545 **López-Delgado, A. C., Delgado, I., Cadenas, V., Sánchez-Cabo, F. and Torres, M.** (2020). Axial skeleton  
546 anterior-posterior patterning is regulated through feedback regulation between Meis transcription factors and  
547 retinoic acid. *Biorxiv* 2020.03.09.983106.
- 548 **Madisen, L., Zwingman, T. A., Sunkin, S. M., Oh, S. W., Zariwala, H. A., Gu, H., Ng, L. L., Palmiter, R.**  
549 **D., Hawrylycz, M. J., Jones, A. R., et al.** (2009). A robust and high-throughput Cre reporting and  
550 characterization system for the whole mouse brain. *Nat Neurosci* **13**, 133–40.
- 551 **Manno, G. L., Soldatov, R., Zeisel, A., Braun, E., Hochgerner, H., Petukhov, V., Lidschreiber, K., Kastri,**  
552 **M. E., Lönnerberg, P., Furlan, A., et al.** (2018). RNA velocity of single cells. *Nature* **560**, 494–498.
- 553 **Mathew, S. J., Hansen, J. M., Merrell, A. J., Murphy, M. M., Lawson, J. A., Hutcheson, D. A., Hansen, M.**  
554 **S., Angus-Hill, M. and Kardon, G.** (2011). Connective tissue fibroblasts and Tcf4 regulate myogenesis.  
555 *Dev Camb Engl* **138**, 371–84.
- 556 **McDavid, A., Finak, G. and Gottardo, R.** (2016). The contribution of cell cycle to heterogeneity in single-cell  
557 RNA-seq data. *Nat Biotechnol* **34**, 591–593.
- 558 **McGinnis, C. S., Murrow, L. M. and Gartner, Z. J.** (2019). DoubletFinder: Doublet Detection in Single-Cell  
559 RNA Sequencing Data Using Artificial Nearest Neighbors. *Cell Syst* **8**, 329-337.e4.
- 560 **Micheli, A. J. D., Swanson, J. B., Disser, N. P., Martinez, L. M., Walker, N. R., Oliver, D. J., Cosgrove, B.**  
561 **D. and Mendias, C. L.** (2020). Single-cell transcriptomic analysis identifies extensive heterogeneity in the  
562 cellular composition of mouse Achilles tendons. *Am J Physiol-cell Ph* **319**, C885–C894.
- 563 **Moosdijk, A. A. A., Grift, Y. B. C., Man, S. M. A., Zeeman, A. L. and Amerongen, R.** (2020). A novel  
564 Axin2 knock-in mouse model for visualization and lineage tracing of WNT/CTNBN1 responsive cells.  
565 *Genesis* **58**, e23387.
- 566 **Muhl, L., Genové, G., Leptidis, S., Liu, J., He, L., Mocci, G., Sun, Y., Gustafsson, S., Buyandelger, B.,**  
567 **Chivukula, I. V., et al.** (2020). Single-cell analysis uncovers fibroblast heterogeneity and criteria for  
568 fibroblast and mural cell identification and discrimination. *Nat Commun* **11**, 3953.
- 569 **Muzumdar, M. D., Tasic, B., Miyamichi, K., Li, L. and Luo, L.** (2007). A global double-fluorescent Cre  
570 reporter mouse. *Genesis (New York, N.Y. : 2000)* **45**, 593–605.
- 571 **Noden, D. M. and Epstein, M. L.** (2010). Embryonic origins of avian and mammalian laryngeal  
572 musculoskeletal structures. *Faseb J* **24**, 172.1-172.1.
- 573 **Noden, D. M. and Trainor, P. A.** (2005). Relations and interactions between cranial mesoderm and neural crest  
574 populations. *Journal of anatomy* **207**, 575–601.
- 575 **Noizet, M., Lagoutte, E., Gratigny, M., Bouschbacher, M., Lazareth, I., Crollius, H. R., Darzacq, X. and**  
576 **Dugast-Darzacq, C.** (2016). Master regulators in primary skin fibroblast fate reprogramming in a human ex  
577 vivo model of chronic wounds. *Wound Repair Regen* **24**, 247–262.
- 578 **Olson, L. E. and Soriano, P.** (2009). Increased PDGFRalpha activation disrupts connective tissue development  
579 and drives systemic fibrosis. *Dev Cell* **16**, 303–13.
- 580 **Prummel, K. D., Nieuwenhuize, S. and Mosimann, C.** (2020). The lateral plate mesoderm. *Dev Camb Engl*  
581 **147**, dev175059.
- 582 **Puré, E. and Blomberg, R.** (2018). Pro-tumorigenic roles of fibroblast activation protein in cancer: back to the  
583 basics. *Oncogene* **37**, 4343–4357.
- 584 **Sacchetti, B., Funari, A., Remoli, C., Giannicola, G., Kogler, G., Liedtke, S., Cossu, G., Serafini, M.,**  
585 **Sampaolesi, M., Tagliafico, E., et al.** (2016). No Identical “Mesenchymal Stem Cells” at Different Times



- 586 and Sites: Human Committed Progenitors of Distinct Origin and Differentiation Potential Are Incorporated  
587 as Adventitial Cells in Microvessels. *Stem Cell Rep* **6**, 897–913.
- 588 **Saga, Y., Miyagawa-Tomita, S., Takagi, A., Kitajima, S., Miyazaki, J. i and Inoue, T.** (1999). MesP1 is  
589 expressed in the heart precursor cells and required for the formation of a single heart tube. *Dev Camb Engl*  
590 **126**, 3437–47.
- 591 **Sambasivan, R., Gayraud-Morel, B., Dumas, G., Cimper, C., Paisant, S., Kelly, R. G., Kelly, R. and**  
592 **Tajbakhsh, S.** (2009). Distinct regulatory cascades govern extraocular and pharyngeal arch muscle  
593 progenitor cell fates. *Developmental cell* **16**, 810–21.
- 594 **Sande, B. V. de, Flerin, C., Davie, K., Waegeneer, M. D., Hulselmans, G., Aibar, S., Seurinck, R., Saelens,**  
595 **W., Cannoodt, R., Rouchon, Q., et al.** (2020). A scalable SCENIC workflow for single-cell gene regulatory  
596 network analysis. *Nat Protoc* 1–30.
- 597 **Sebo, Z. L., Jeffery, E., Holtrup, B. and Rodeheffer, M. S.** (2018). A mesodermal fate map for adipose tissue.  
598 *Development* **145**, dev166801.
- 599 **Sefton, E. M. and Kardon, G.** (2019). Connecting muscle development, birth defects, and evolution: An  
600 essential role for muscle connective tissue. *Curr Top Dev Biol* **132**, 137–176.
- 601 **Shao, X. and Wei, X.** (2018). FOXP1 enhances fibrosis via activating Wnt/ $\beta$ -catenin signaling pathway in  
602 endometriosis. *Am J Transl Res* **10**, 3610–3618.
- 603 **Stuelsatz, P., Shearer, A. and Yablonka-Reuveni, Z.** (2014). Ancestral Myf5 gene activity in periocular  
604 connective tissue identifies a subset of fibro/adipogenic progenitors but does not connote a myogenic origin.  
605 *Developmental biology* **385**, 366–79.
- 606 **Swedlund, B. and Lescroart, F.** (2019). Cardiopharyngeal Progenitor Specification: Multiple Roads to the  
607 Heart and Head Muscles. *Csh Perspect Biol* a036731.
- 608 **Tajbakhsh, S., Rocancourt, D. and Buckingham, M.** (1996). Muscle progenitor cells failing to respond to  
609 positional cues adopt non-myogenic fates in myf-5 null mice. *Nature* **384**, 266–270.
- 610 **Tallquist, M., Weismann, K. and Development, H.-M.** (2000). Early myotome specification regulates PDGFA  
611 expression and axial skeleton development.
- 612 **Tapscott, S. J.** (2005). The circuitry of a master switch: Myod and the regulation of skeletal muscle gene  
613 transcription. *Development* **132**, 2685–2695.
- 614 **Truong, A. H. and Ben-David, Y.** (2000). The role of Fli-1 in normal cell function and malignant  
615 transformation. *Oncogene* **19**, 6482–6489.
- 616 **Tzahor, E., Kempf, H., Mootosamy, R. C., Poon, A. C., Abzhanov, A., Tabin, C. J., Dietrich, S. and**  
617 **Lassar, A. B.** (2003). Antagonists of Wnt and BMP signaling promote the formation of vertebrate head  
618 muscle. *Gene Dev* **17**, 3087–3099.
- 619 **Vinagre, T., Moncaut, N., Carapuço, M., Nóvoa, A., Bom, J. and Mallo, M.** (2010). Evidence for a  
620 Myotomal Hox/Myf Cascade Governing Nonautonomous Control of Rib Specification within Global  
621 Vertebral Domains. *Dev Cell* **18**, 655–661.
- 622 **Wang, W., Niu, X., Stuart, T., Jullian, E., Mauck, W. M., Kelly, R. G., Satija, R. and Christiaen, L.** (2019).  
623 A single-cell transcriptional roadmap for cardiopharyngeal fate diversification. *Nature Cell Biology* **21**, 674–  
624 686.

- 625 **Whitesell, T. R., Chrystal, P. W., Ryu, J.-R. R., Munsie, N., Grosse, A., French, C. R., Workentine, M. L.,**  
626 **Li, R., Zhu, L. J., Waskiewicz, A., et al. (2019).** foxc1 is required for embryonic head vascular smooth  
627 muscle differentiation in zebrafish. *Developmental biology* **453**, 34–47.
- 628 **Wood, W. M., Otis, C., Etemad, S. and Goldhamer, D. J. (2020).** Development and patterning of rib  
629 primordia are dependent on associated musculature. *Dev Biol*.
- 630 **Yamamoto-Shiraishi, Y. and Kuroiwa, A. (2013).** Wnt and BMP signaling cooperate with Hox in the control  
631 of Six2 expression in limb tendon precursor. *Dev Biol* **377**, 363–374.
- 632
- 633

Figure 1 A

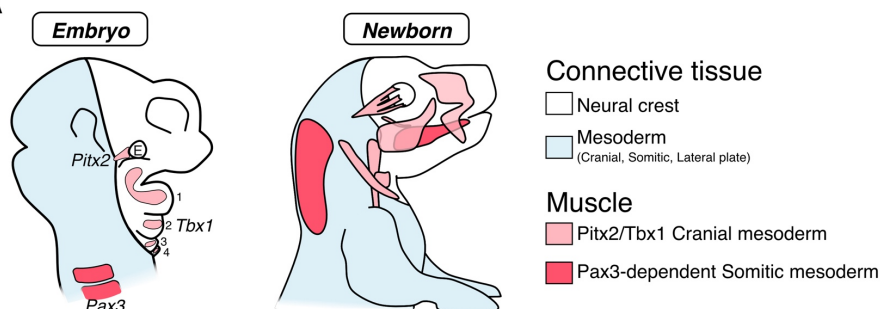

B

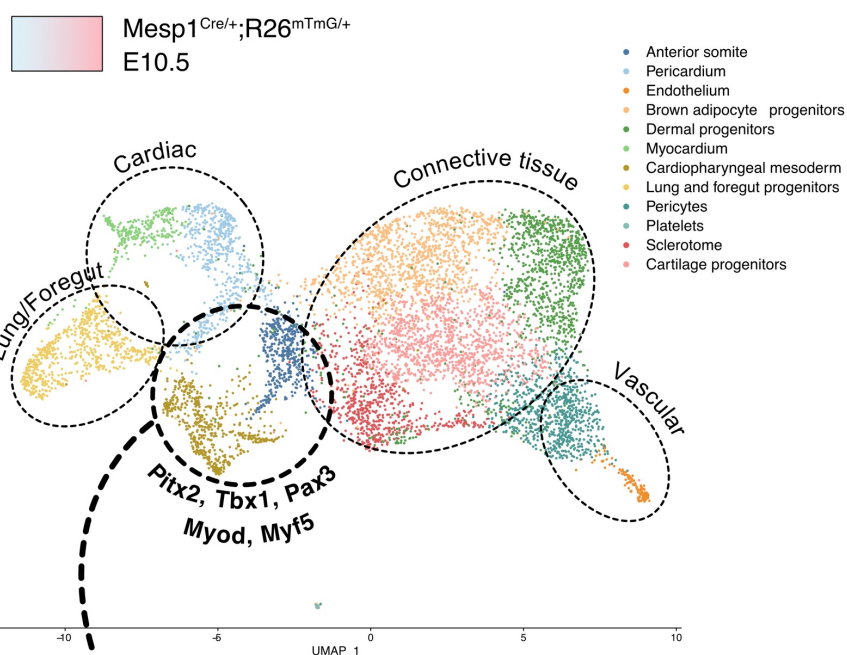

C

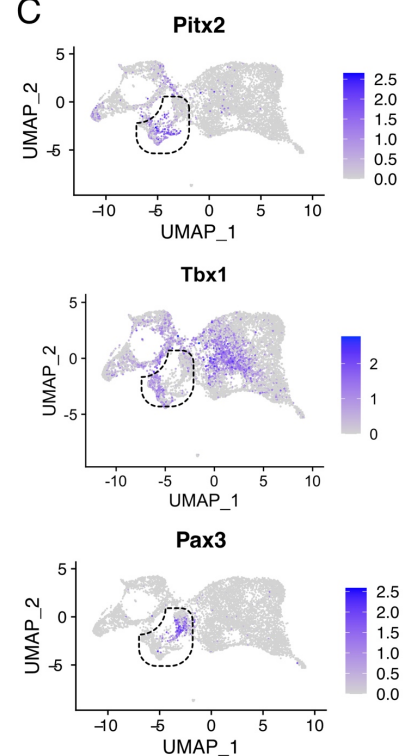

D

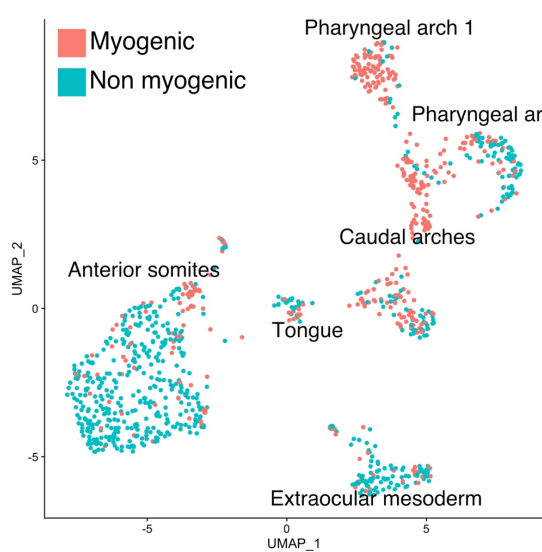

E

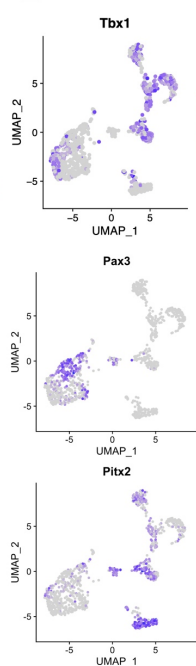

F

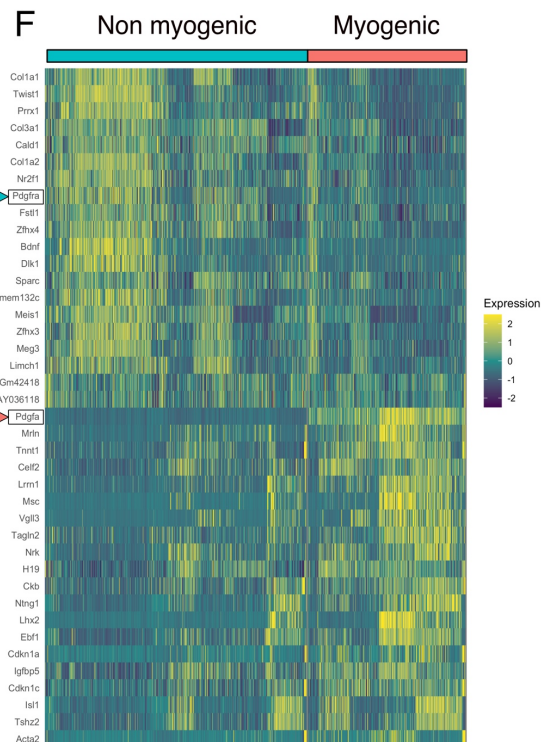

**Figure 1. scRNAseq reveals non-myogenic populations of cranial mesoderm lineages.**

A) Scheme of connective tissue origin in the head and known mesodermal upstream regulators. E: Eye, 1-4: Pharyngeal arches 1-4.

B) UMAP of *Mesp1*<sup>Cre/+</sup>; *R26*<sup>mTmG/+</sup> E10.5 scRNAseq with main cell types highlighted.

C) UMAP expression plots of *Pitx2* (EOM), *Tbx1* (cranial mesoderm except EOM) and *Pax3* (somitic mesoderm), indicating the clusters of progenitors.

D) UMAP of progenitor subset annotated as myogenic and non-myogenic based on expression patterns found in E and F.

E) UMAP expression plots *Pitx2*, *Tbx1* and *Pax3*.

F) Heatmap of top 20 markers of myogenic versus non-myogenic clusters. *Pdgfra/Pdgfa* genes are highlighted.

Figure 2

RNA velocity & Driver genes  
(*scvelo*)

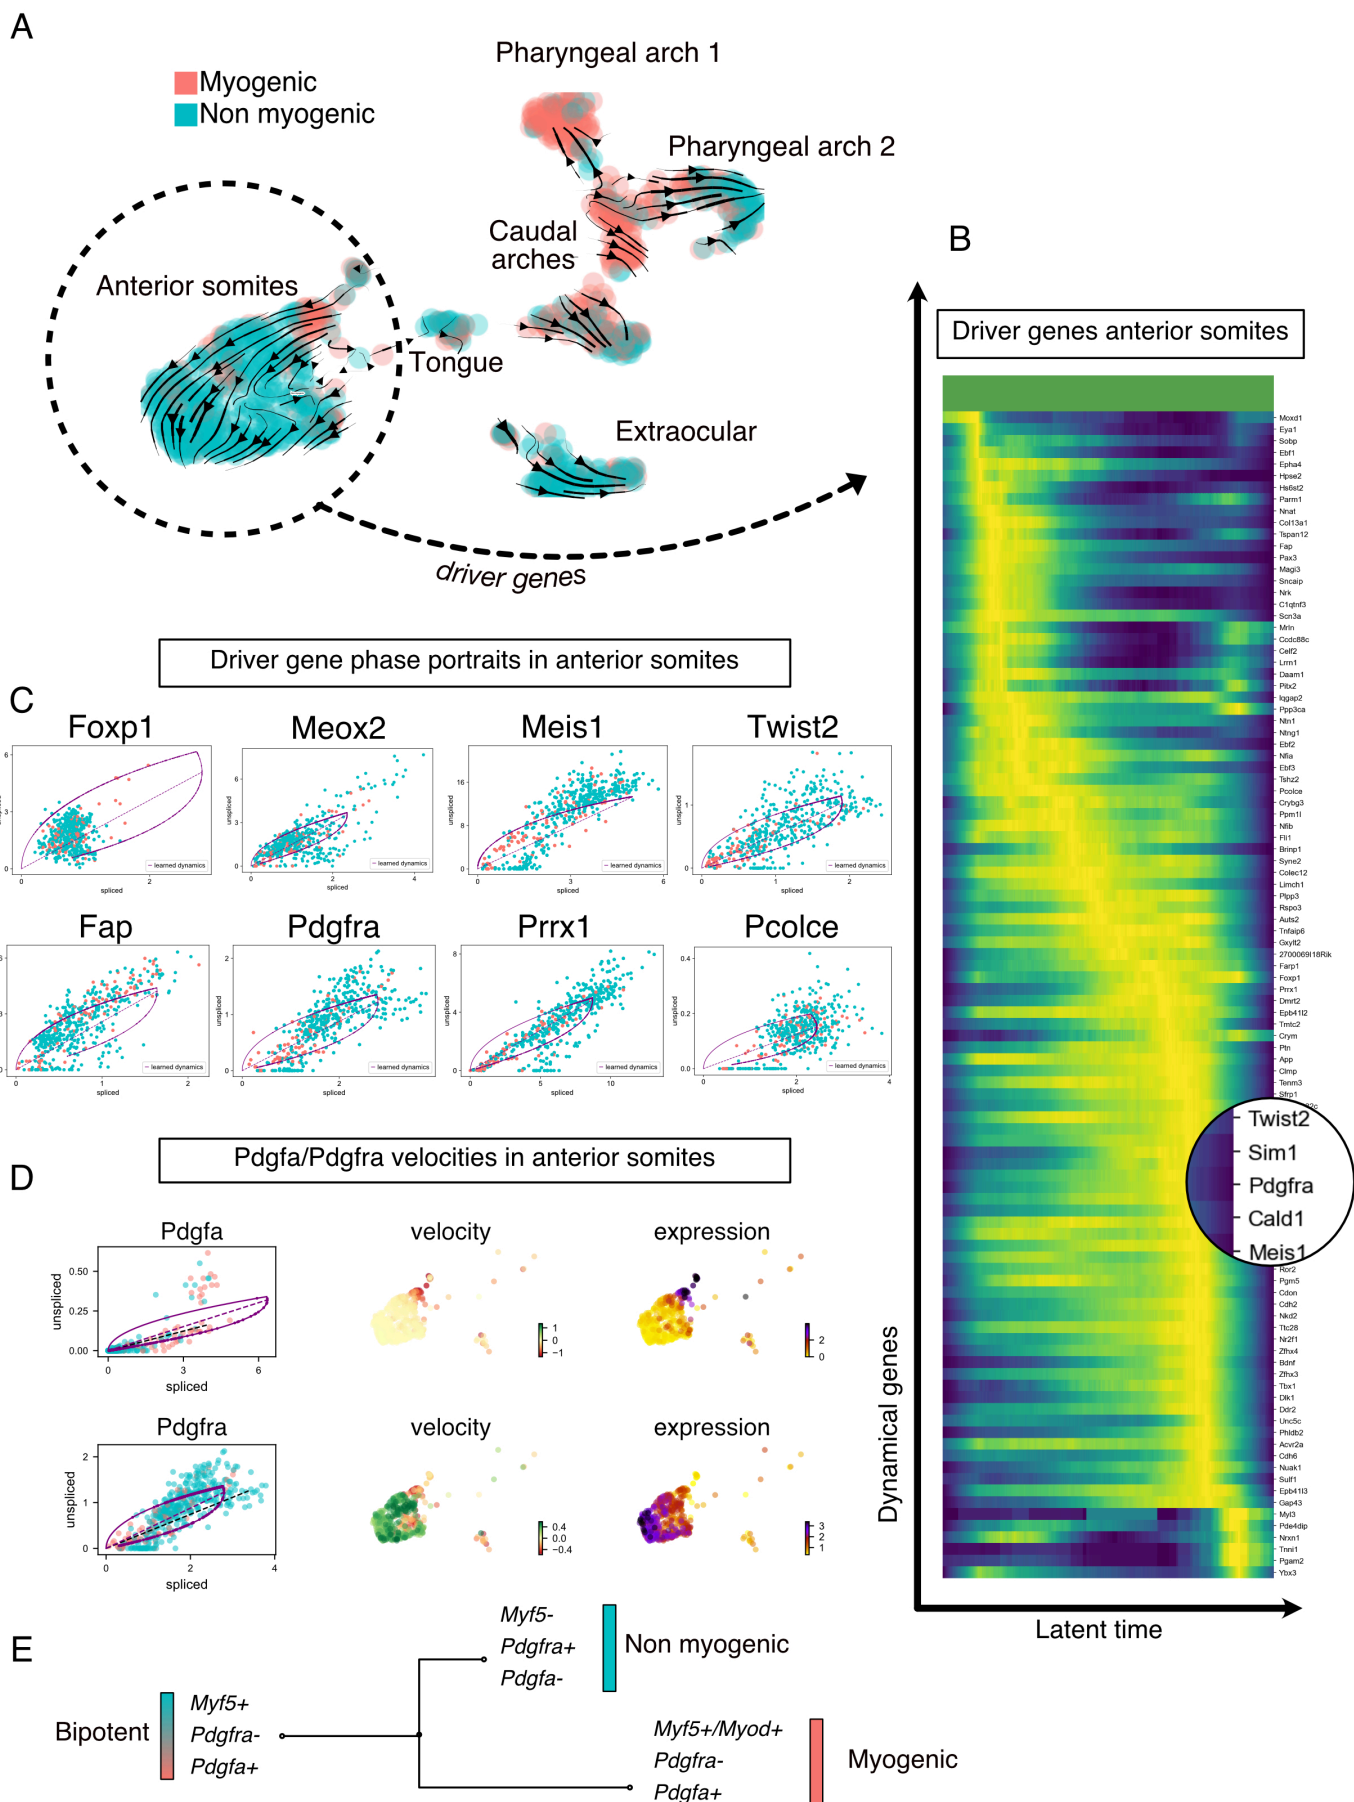

**Figure 2. Transcriptomic dynamics reveal a myogenic to non-myogenic transition in anterior somite progenitors.**

A) Velocity UMAP plots displaying myogenic and non-myogenic clusters. Arrows represent the lineage progression based on RNA velocity (relative abundance of unspliced and spliced transcripts).

B) Heatmap of driver genes accounting for anterior somite velocity, highlighting *Pdgfra*.

C) Phase portraits of few selected driver genes in the anterior somites: *Foxp1*, *Meox2*, *Meis1*, *Twist2*, *Fap*, *Pdgfra*, *Prrx1* and *Pcolce*. Y-axis represents the amount of unspliced transcript per cell; X-axis represents the number of spliced transcripts per cell. A high fraction of unspliced variants indicates an active transcription of the locus, while the inverse indicates inactive/repressed transcription. Dynamics of transcription were inferred at a gene- and cluster-specific level (see Methods).

D) Phase portraits, velocity and expression plots of *Pdgfa* and *Pdgfra* showing splicing dynamics of these 2 genes.

E) Working model of myogenic and non-myogenic fate decision from a common bipotent progenitor in anterior somites.

Figure 3

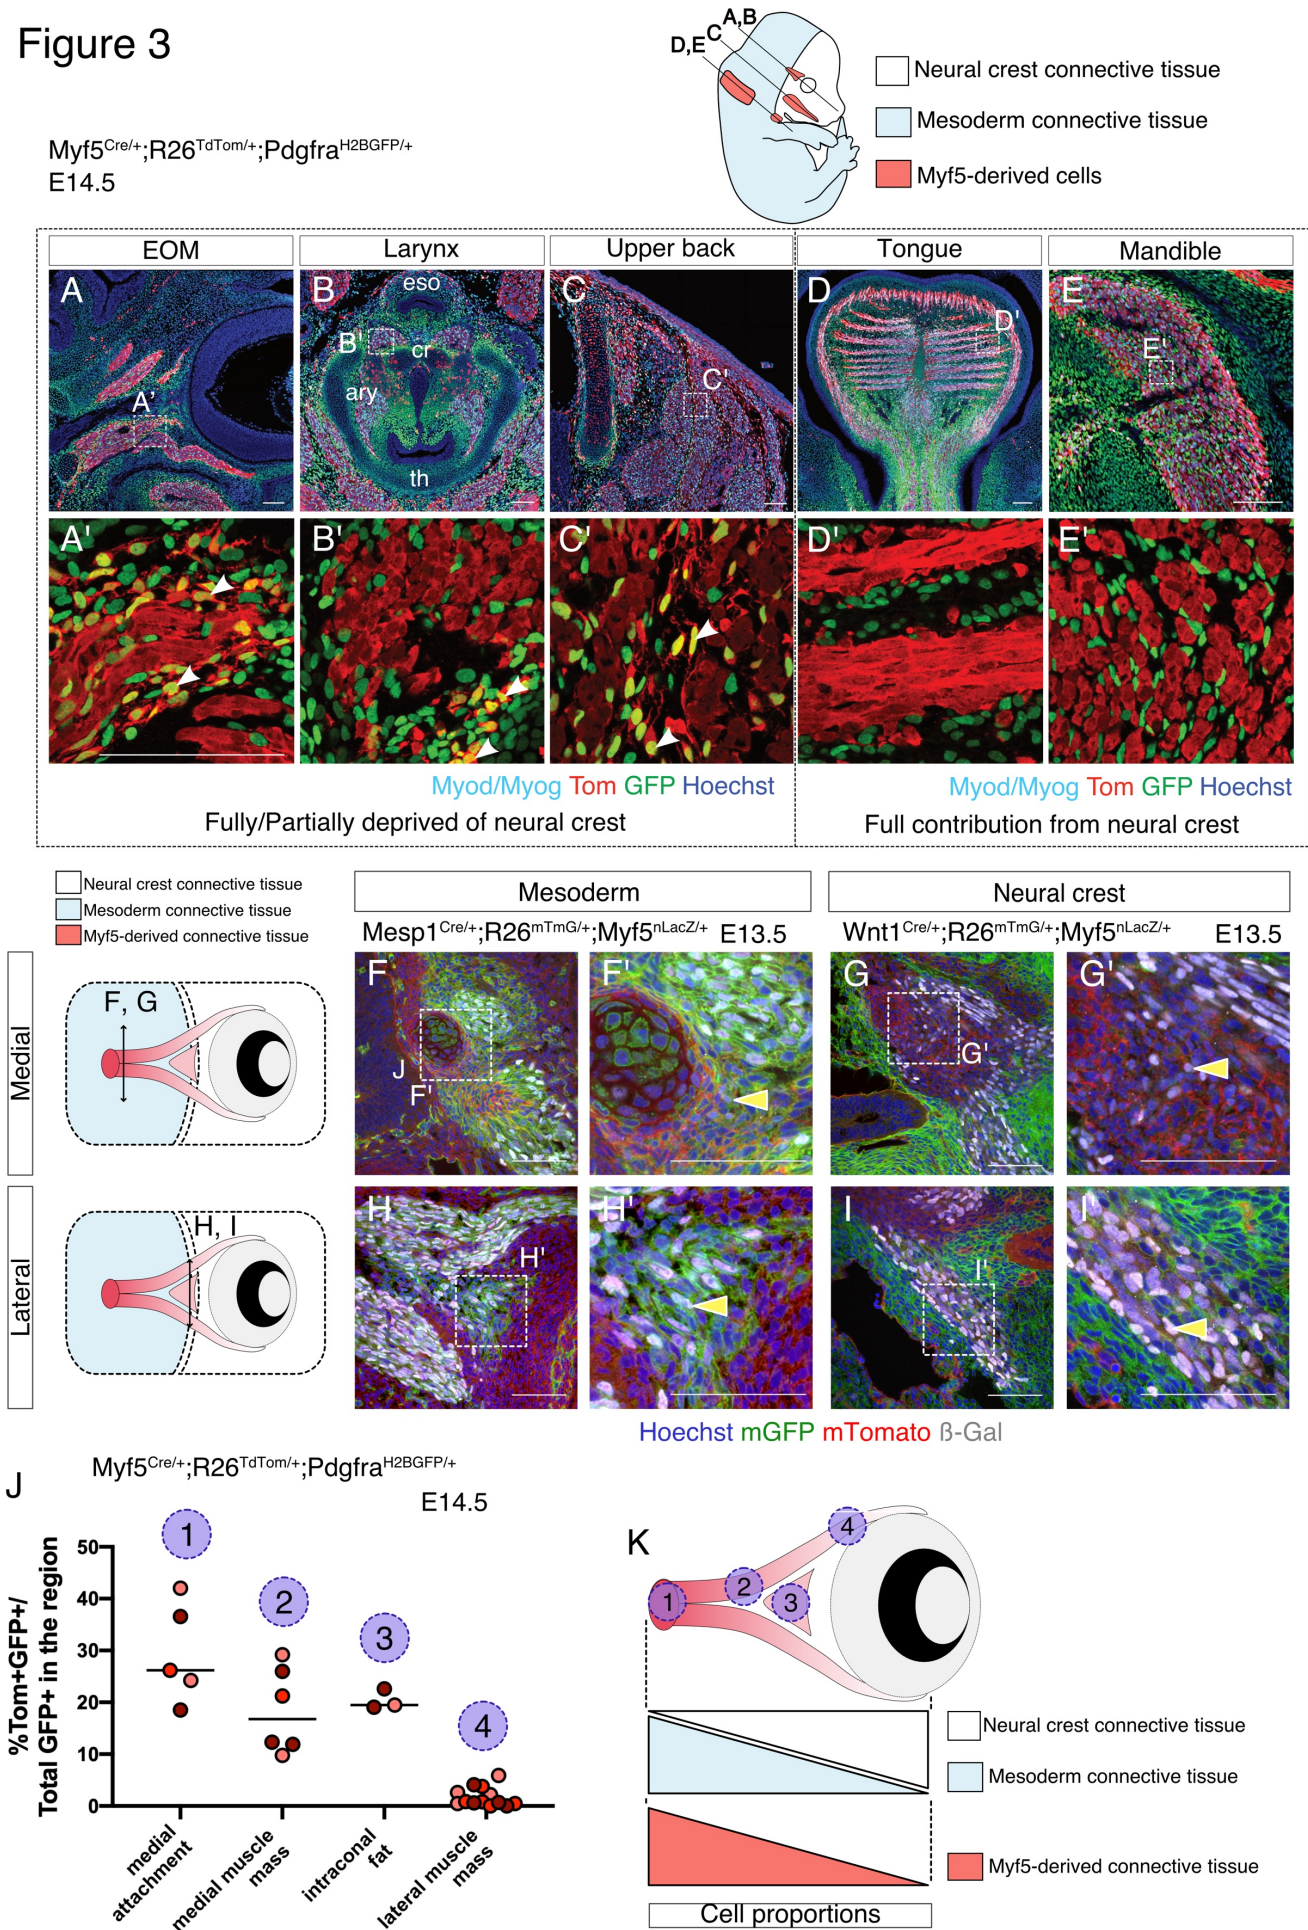

**Figure 3. Myf5-derived mesodermal connective tissue partially compensates for the lack of neural crest.**

A-E') Transverse sections of an E14.5 *Myf5<sup>Cre/+</sup>; R26<sup>TdTomato/+</sup>; Pdgfra<sup>H2BGFP/+</sup>* embryo immunostained for Myod/Myog. White arrowheads indicated cells double-positive GFP/Tomato and negative for Myod/Myog. (n=3 embryos).

F-I') Transverse cryosections of the EOM at E13.5 of *Wnt1<sup>Cre/+</sup>; R26<sup>mTmG/+</sup>; Myf5<sup>nlacZ/+</sup>* (G,I) and *Mesp1<sup>Cre/+</sup>; R26<sup>mTmG/+</sup>; Myf5<sup>nlacZ/+</sup>* (F,H) immunostained for  $\beta$ -gal, at the level of the medial attachment (F,G) and lateral muscle masses (H,I). Yellow arrowhead indicates *Myf5*-expressing cells in the context of mesodermal and neural crest lineages. (n=2 embryos with 5 tissue sections analyzed per embryo)

J) Quantifications of the proportion of double positive cells in E14.5 *Myf5<sup>Cre/+</sup>; R26<sup>TdTomato/+</sup>; Pdgfra<sup>H2BGFP/+</sup>* embryo in various regions throughout the EOM (n=3 embryos, with 5 tissue sections analyzed per embryo).

K) Scheme highlighting the quantified regions in (J), and summarising the contribution of each population to connective tissue.



Figure 4

Extraocular muscles

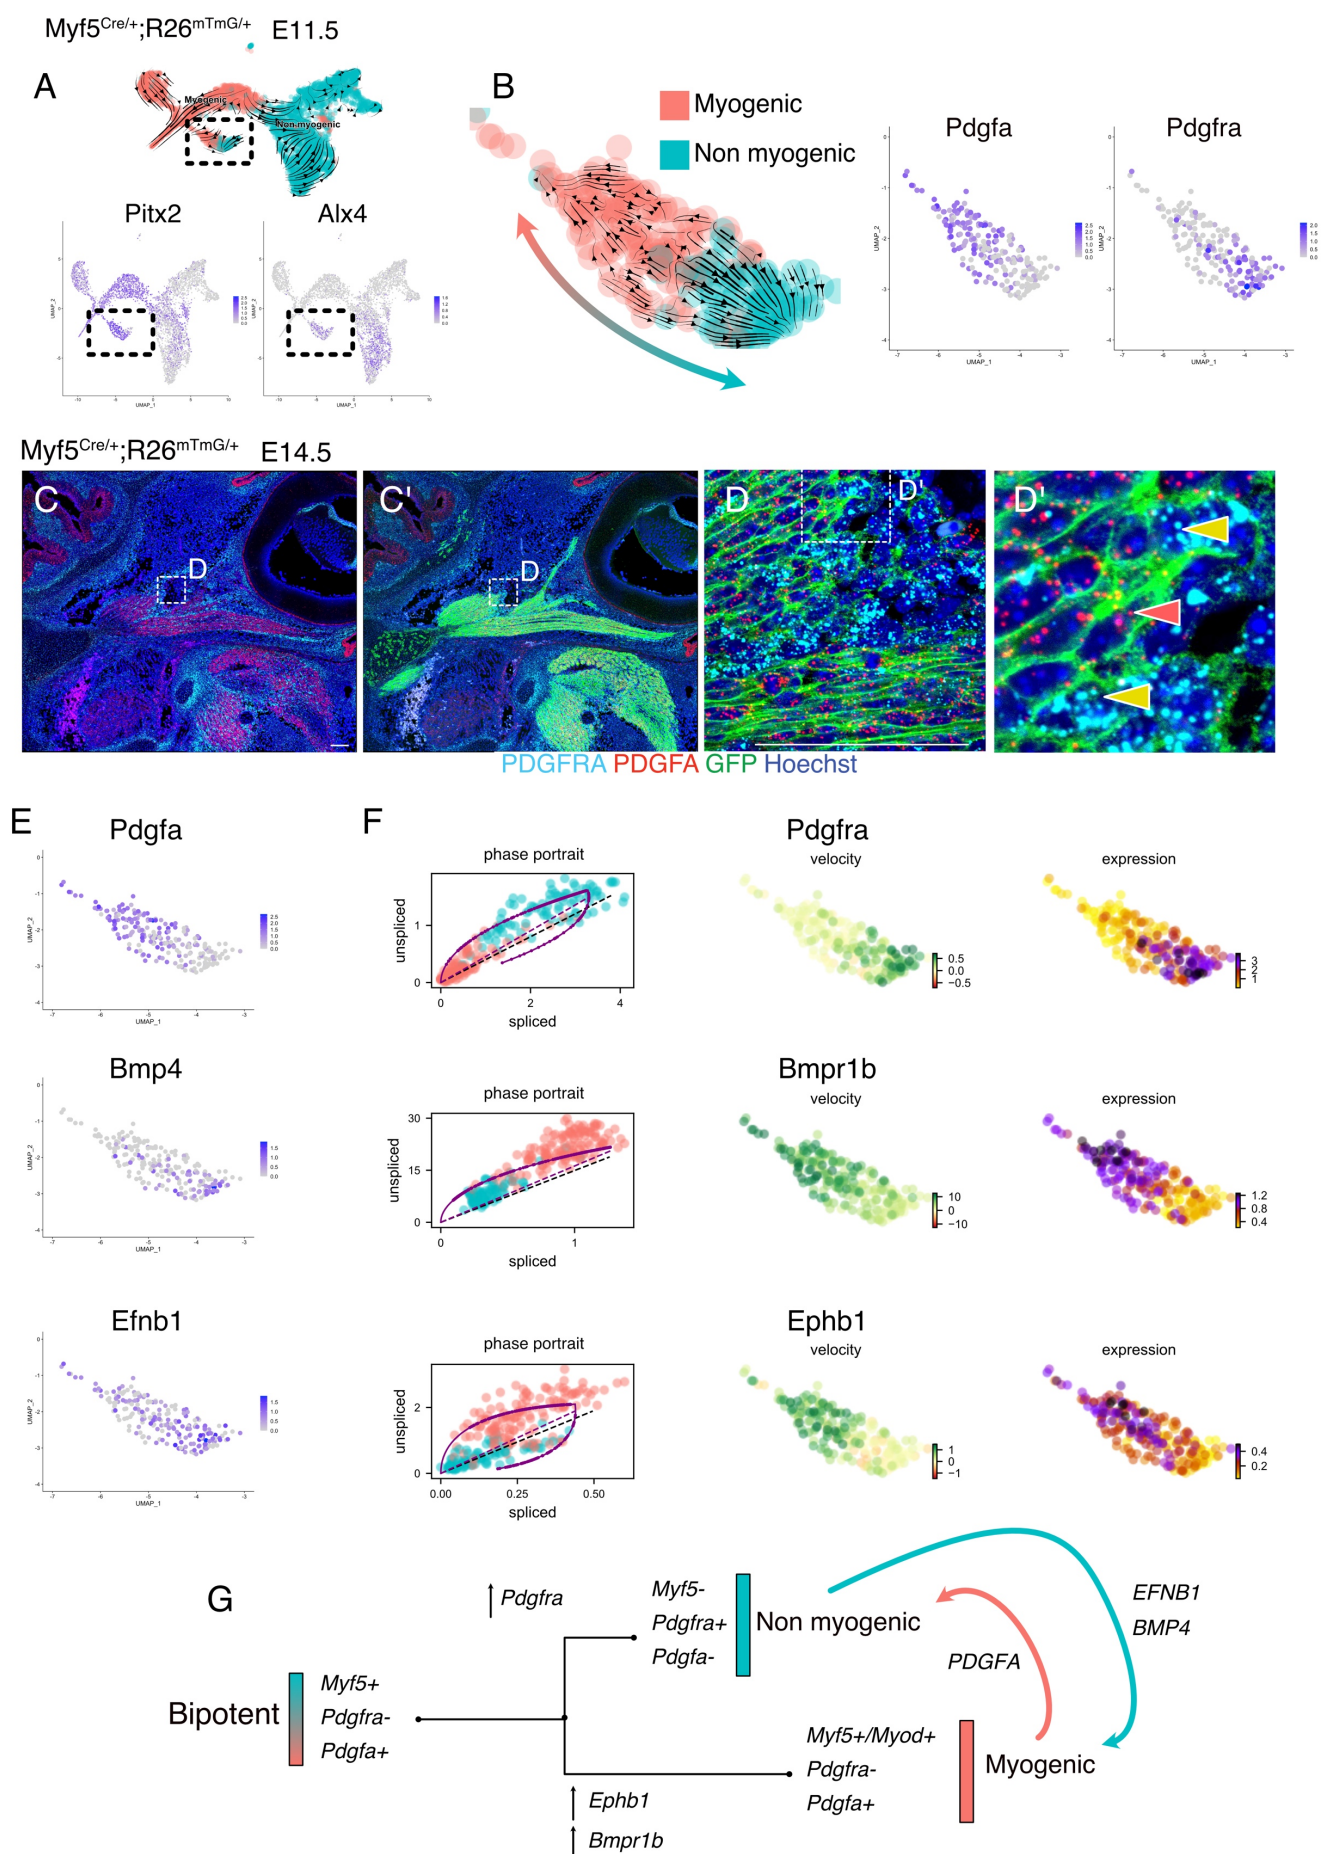

**Figure 4. Maintenance of signalling cues between Myf5-derived myogenic and non-myogenic cells in EOM.**

- A) UMAPs of *Myf5<sup>Cre/+</sup>; R26<sup>mTmG/+</sup>* E11.5 EOM subset and the respective RNA velocity trajectories (top). Expression plots of *Pitx2* and *Alx4*, marking the EOM cluster (bottom).
- B) Velocities within myogenic and non-myogenic clusters and expression plots of *Pdgfa* and *Pdgfra*.
- C-D') RNAscope on *Myf5<sup>Cre/+</sup>; R26<sup>mTmG/+</sup>* E14.5 tissue sections with *Pdgfra* (cyan) and *Pdgfa* (red) probes. *Myf5*-derived cells are labelled by membrane GFP staining.
- D') High magnification of D. Yellow arrowheads indicate *Myf5*-derived *Pdgfra*-expressing cells (non-myogenic). Red arrowheads indicate *Myf5*-derived *Pdgfa*-expressing cells (myogenic).
- E) Expression pattern of ligands *Pdgfa*, *Bmp4* and *Efnb1*.
- F) Phase portrait, gene velocity and expression plots of receptors *Pdgfra*, *Bmpr1b* and *Ephb1*.
- G) Model of myogenic and non-myogenic cell communication following bifurcation

Figure 5

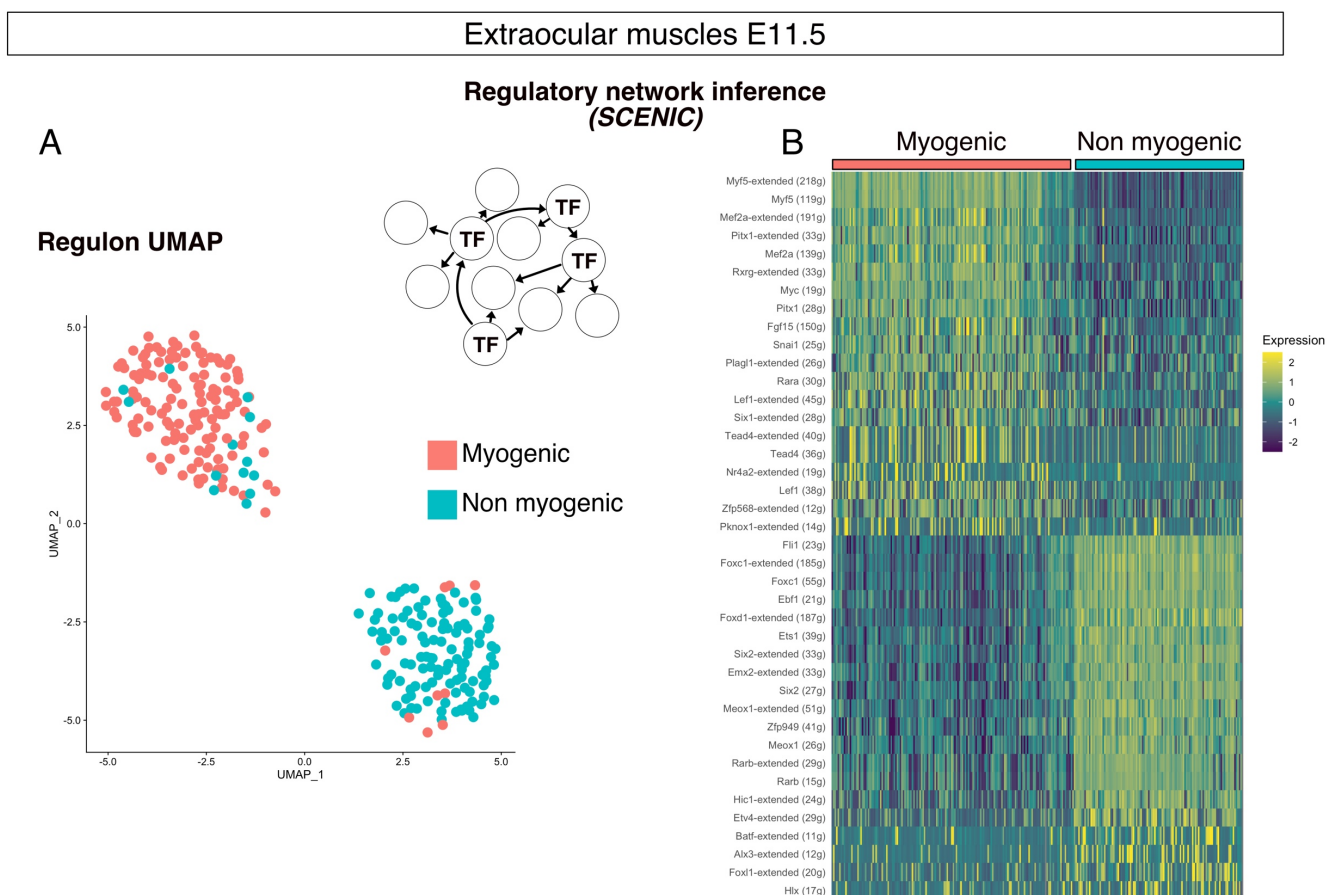

Extraocular muscles E12.5

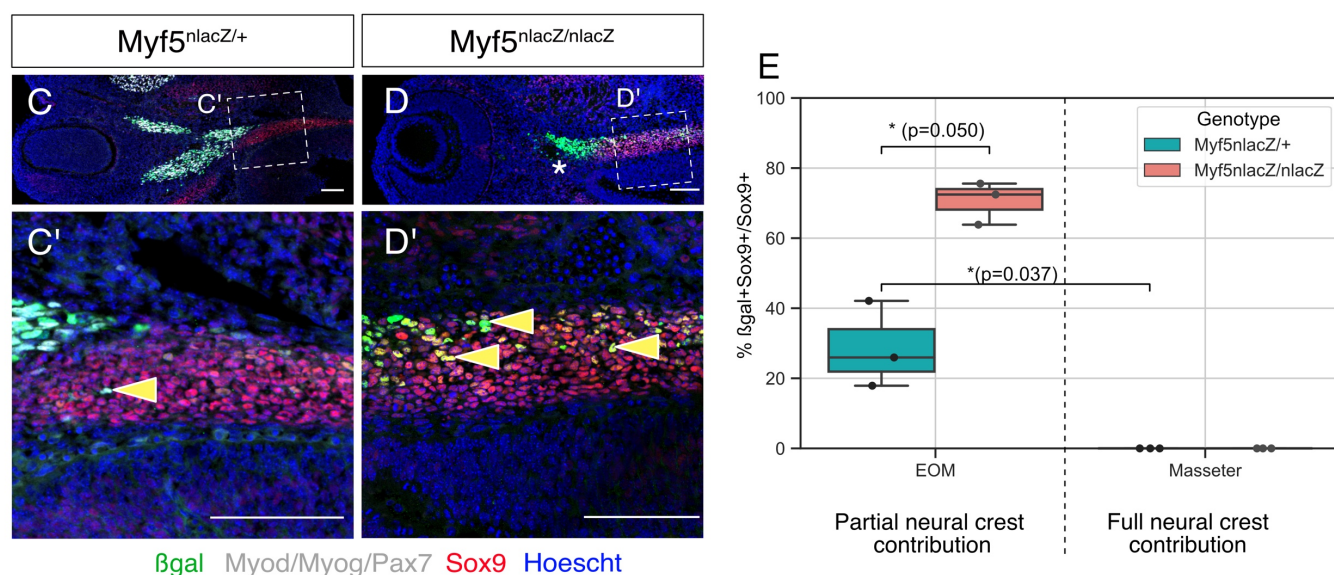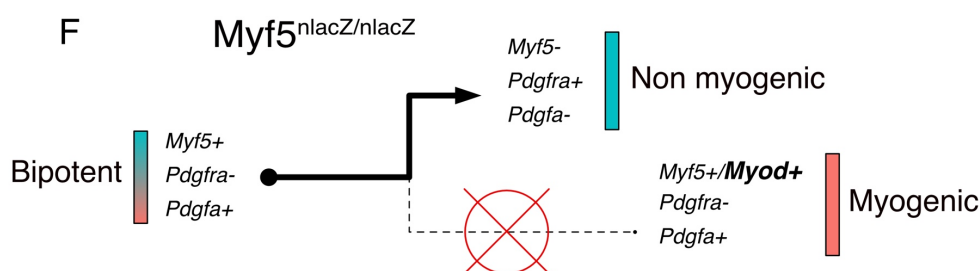

**Figure 5. Disruption of *Myf5* increases the connective tissue output from bipotent cells**

A) UMAP of *Myf5*<sup>Cre/+</sup>; *R26*<sup>mTmG/+</sup> E11.5 EOM based on SCENIC Regulon activity (Area Under Curve score).

B) Heatmap of top regulons (transcription factor and associated targets). The suffix “\_extended” indicates that the regulon includes motifs that have been linked to the TF by lower confidence annotations, for instance, inferred by motif similarity. Number in brackets indicates number of genes comprising the regulon.

C-D) Transverse sections of *Myf5*<sup>nlacZ/+</sup> (C-C'), and *Myf5*<sup>nlacZ/nlacZ</sup> (D-D') in the EOM region at E12.5 immunostained for  $\beta$ -gal (green), Sox9 (red) and Myod/Myog/Pax7 (grey). Yellow arrowheads indicate  $\beta$ -gal/Sox9 double positive cells and show an expansion these cells in the mutant. Asterisk highlights the lack of myogenic progenitors in the EOM region of the mutant embryo, indicated by the absence of Myod/Myog/Pax7 staining.

E) Quantification of proportion of  $\beta$ -gal+;Sox9+ double positive cells in the total Sox9+ population of the EOM and Masseter muscles. Each dot is a different sample, the center line of the boxplot is the median value. (n=3 embryos, p-values were calculated using a two-sided Mann-Whitney U test).

F) Model of lineage progression from bipotent cells in a *Myf5* null background.

Figure 6

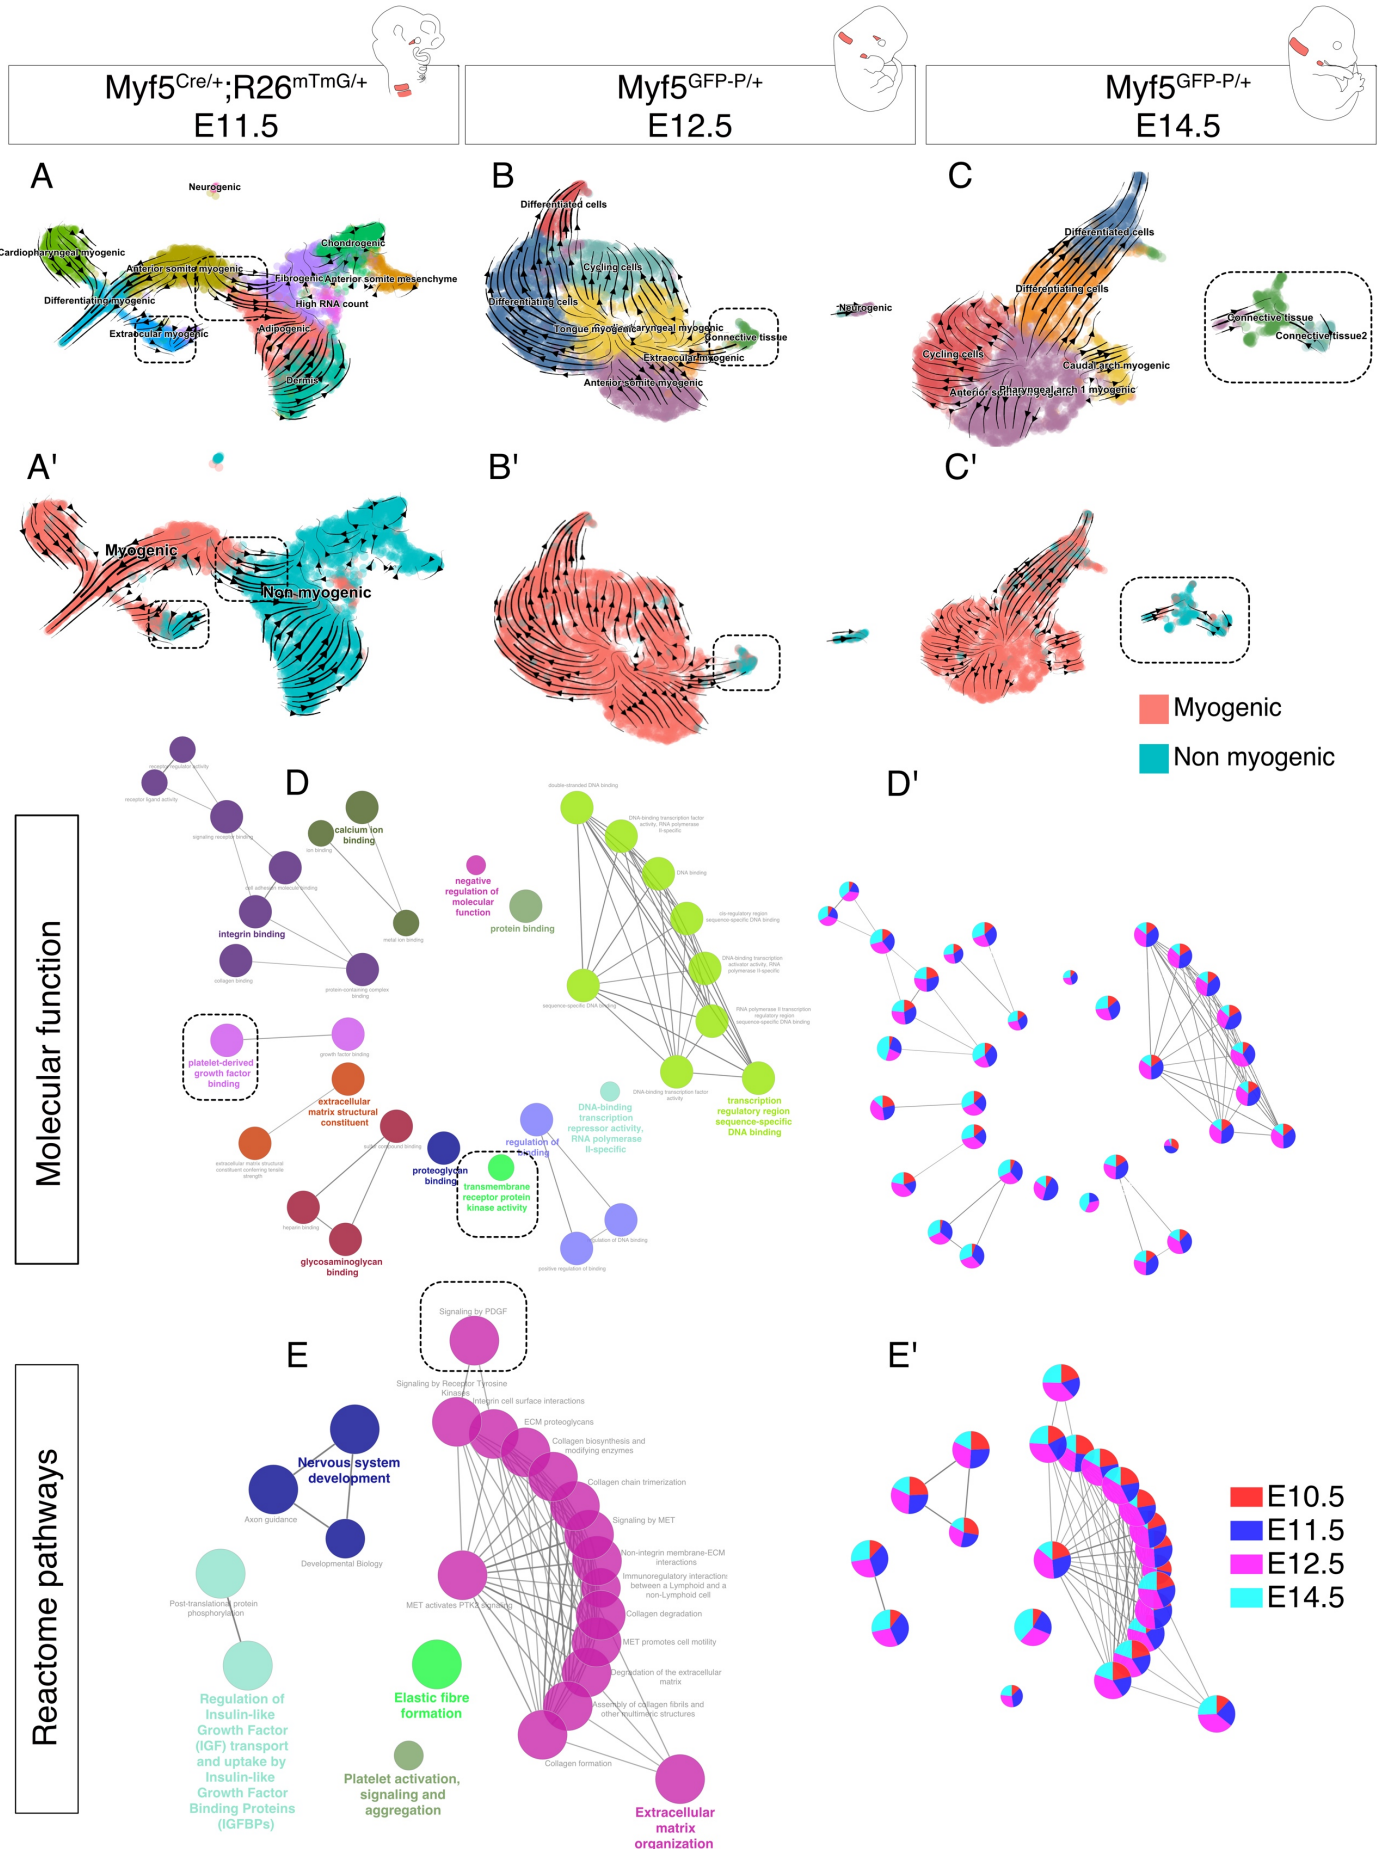

**Figure 6. Myf5-derived non-myogenic cells are continuously generated up to fetal stages**

A-C') RNA velocity plots of *Myf5<sup>Cre/+</sup>; R26<sup>mTmG/+</sup>* E11.5, *Myf5<sup>GFP-P/+</sup>* E12.5 and *Myf5<sup>GFP-P/+</sup>* E14.5 datasets displaying cell-type annotation (A-C) and myogenic and non-myogenic clustering (A'-C').

D-E) Gene ontology network of GO Molecular Function and Reactome pathway performed on combined top 100 markers.

(D'-E') Relative contribution of each stage to term node.

Figure 7

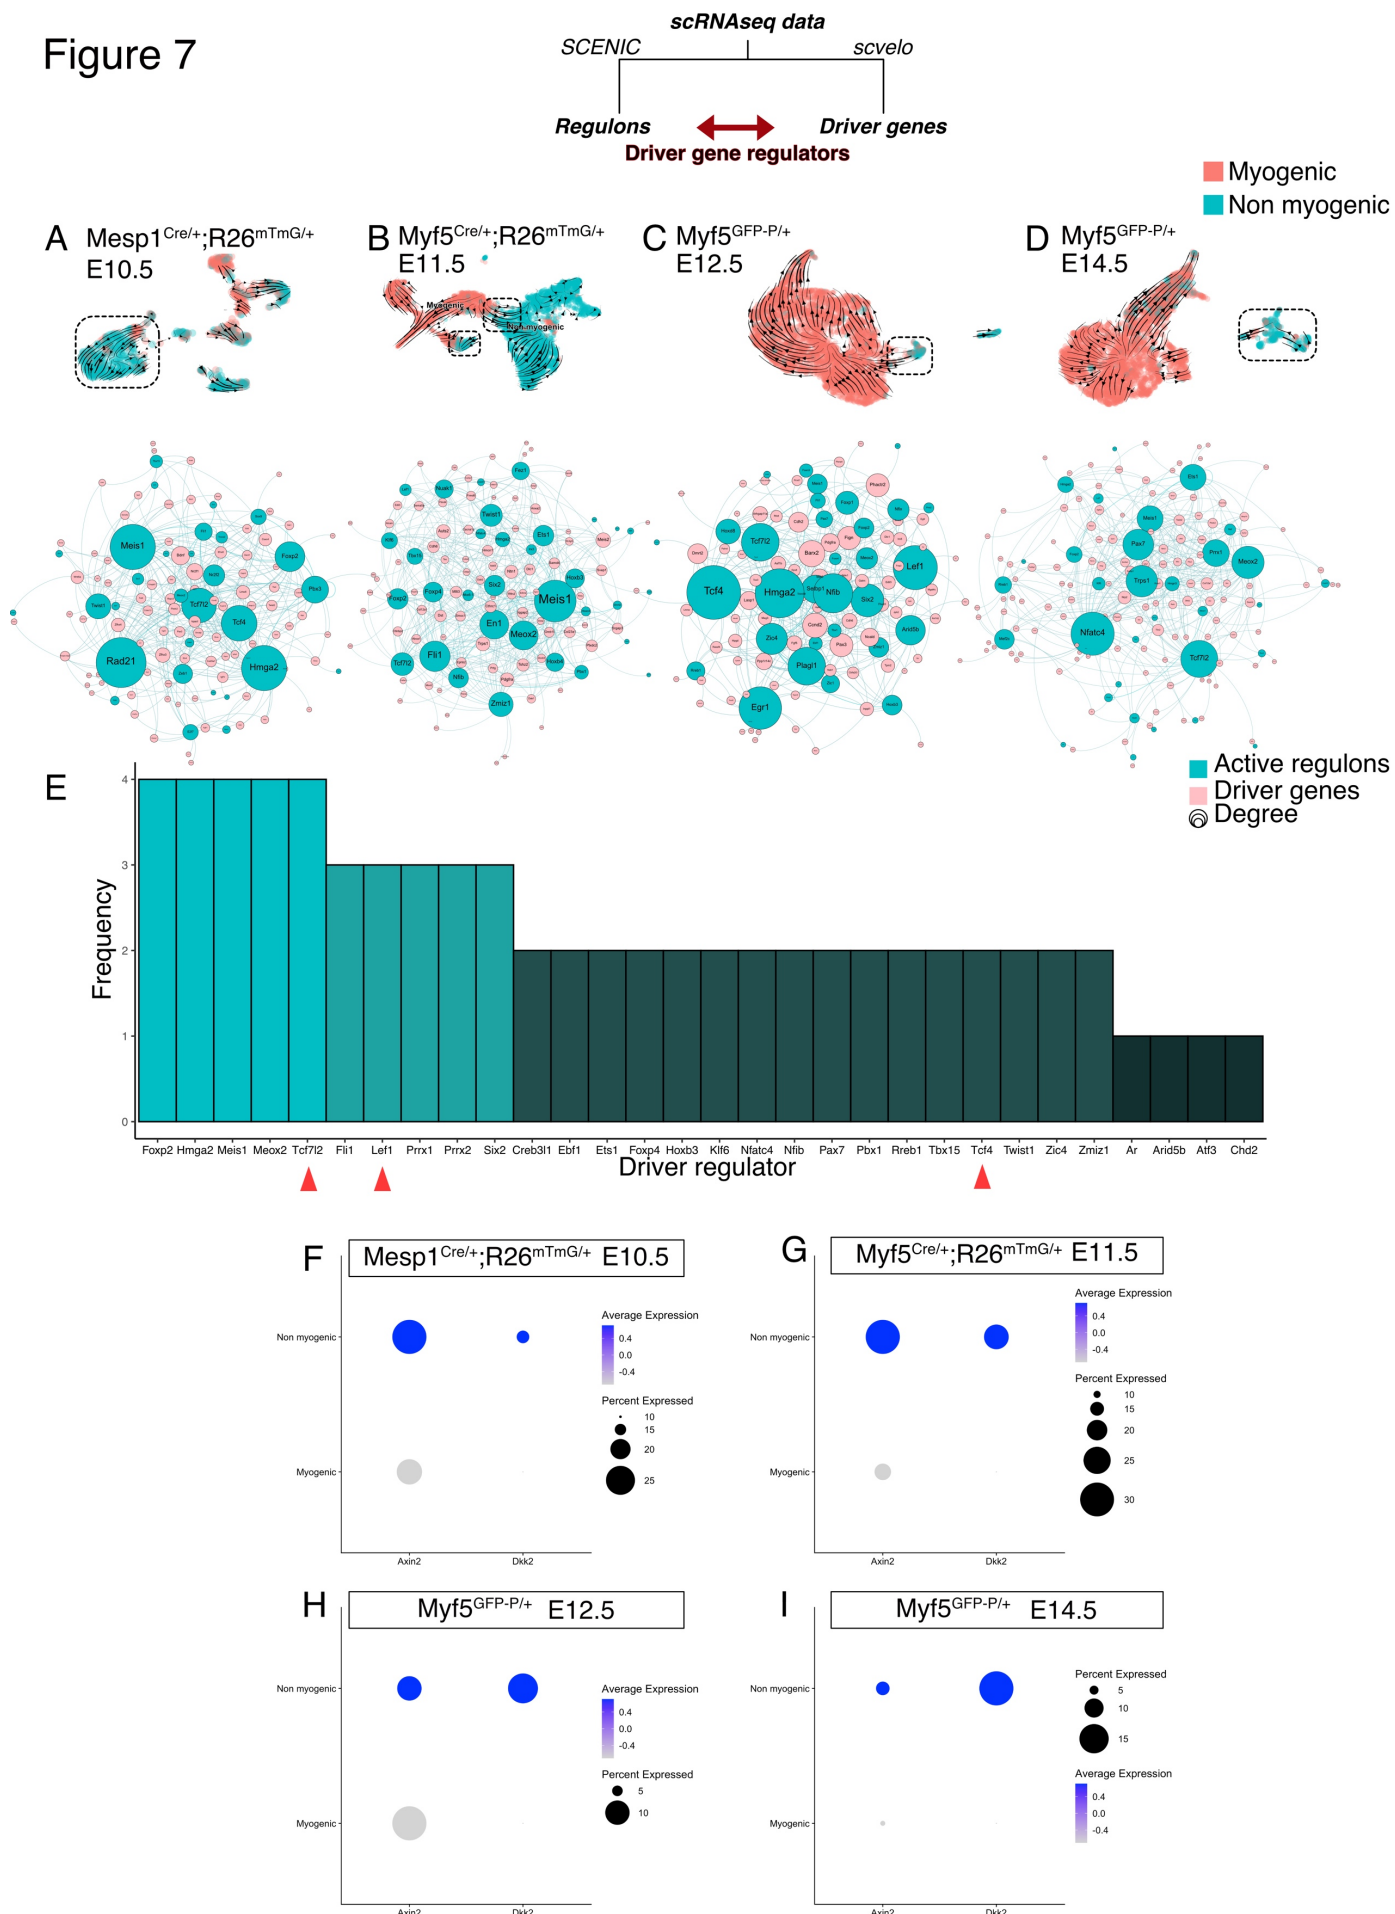

**Figure 7. A shared program including Wnt/ $\beta$ -cat activity supports non-myogenic fate transition at various stages and anatomical locations**

A-D) Velocity UMAP highlighting the non-myogenic cluster at each stage (dotted box), from which the underlying network was inferred. Driver genes and regulatory networks (regulons) were produced for each stage independently, and a stage-specific network of active transcription factor and associated driver gene targets was built. Size of nodes corresponds to the number of edges (connections) they have, i.e. the number of driver genes the transcription factor regulates.

E) Histogram displaying frequency of appearance of most predominant transcription factors as driver regulators (4= present in all 4 datasets as driver regulon, 1= present in a single dataset). Red arrowheads highlight members of the Wnt/ $\beta$ -cat pathway Tcf4, Tcf7l2 and Lef1.

F-I) Dotplot of the expression levels and percent of Axin2 and Dkk2 in the myogenic and the non-myogenic portions of all 4 datasets.



## **SUPPLEMENTAL INFORMATION**

### **Identification of bipotent progenitors that give rise to myogenic and connective tissues in mouse**

Alexandre Grimaldi<sup>1,2</sup>, Glenda Comai<sup>1,2</sup>, Sébastien Mella<sup>1,2</sup>, Shahragim Tajbakhsh<sup>1,2,\*</sup>

<sup>1</sup>Stem Cells & Development Unit, 25 rue du Dr. Roux, Institut Pasteur, 75015 Paris, France

<sup>2</sup>UMR CNRS 3738, Institut Pasteur, Paris, France

\*corresponding author

## Figure S1

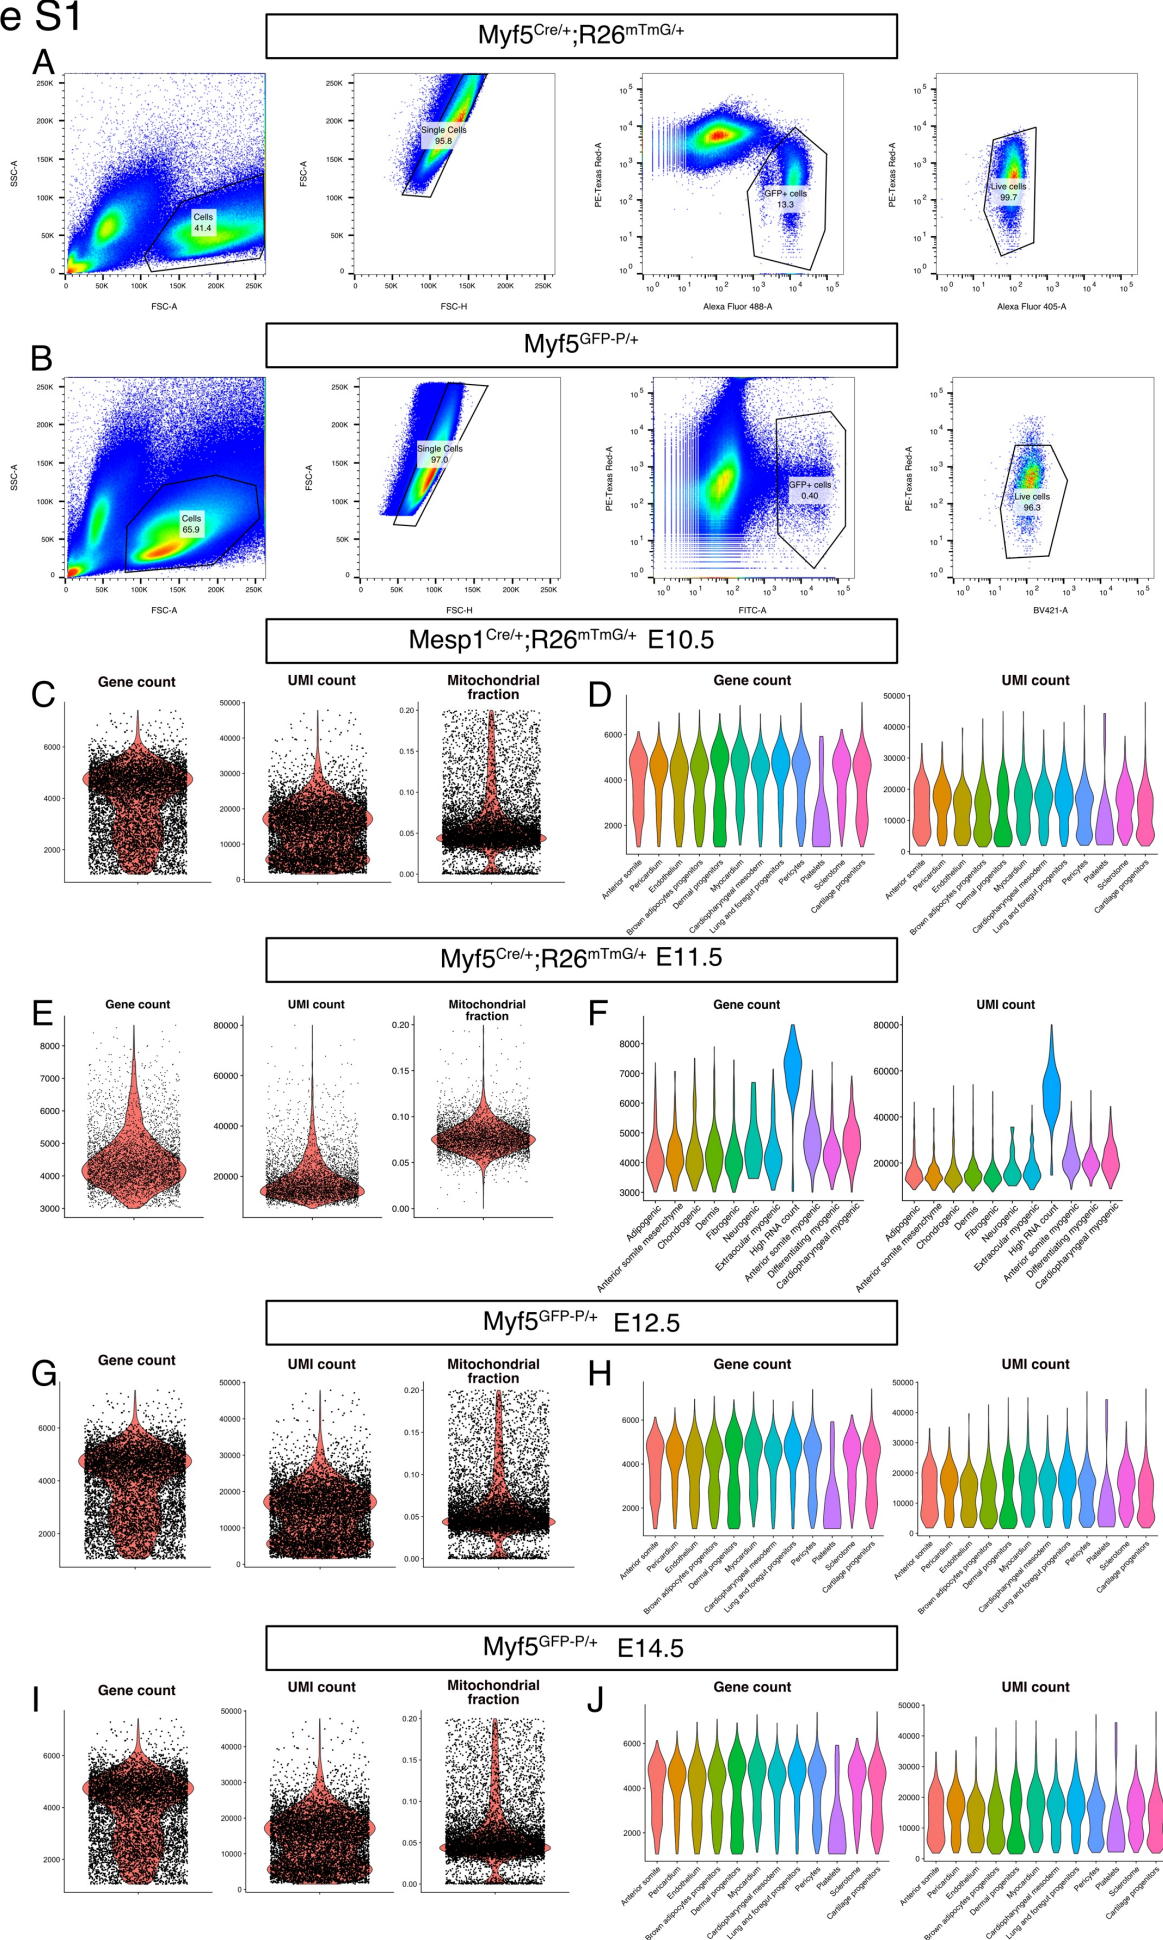

**Supplemental Figure S1. Seurat library preprocessing metrics.**

A-B) Gating strategy used to isolate by FACS *Myf5<sup>Cre/+</sup>; R26<sup>mTomG/+</sup>* (A) and *Myf5<sup>GFP-P/+</sup>* cells (B). To isolate *Mesp1<sup>Cre/+</sup>; R26<sup>mTomG/+</sup>* cells, the same strategy as in (A) was used. The Alexa Fluor 488 and FITC channels were used interchangeably to identify GFP+ cells. The BV421 and Alexa Fluor 405 were used interchangeably to identify the Calcein Blue+ live cells. The PE-Texas Red channel was used to discard mTomato+ cells and Propidium Iodide + cells. The percentage of cells captured by each gate is displayed on each plot.

C, E, G, I) Violin plots of gene count, UMI count and mitochondrial fraction for each dataset.

D, F, H, J) Gene count and UMI count per cell type for each dataset. A “High count” cluster was found in the E11.5 dataset, and was removed in downstream analysis.

## Figure S2

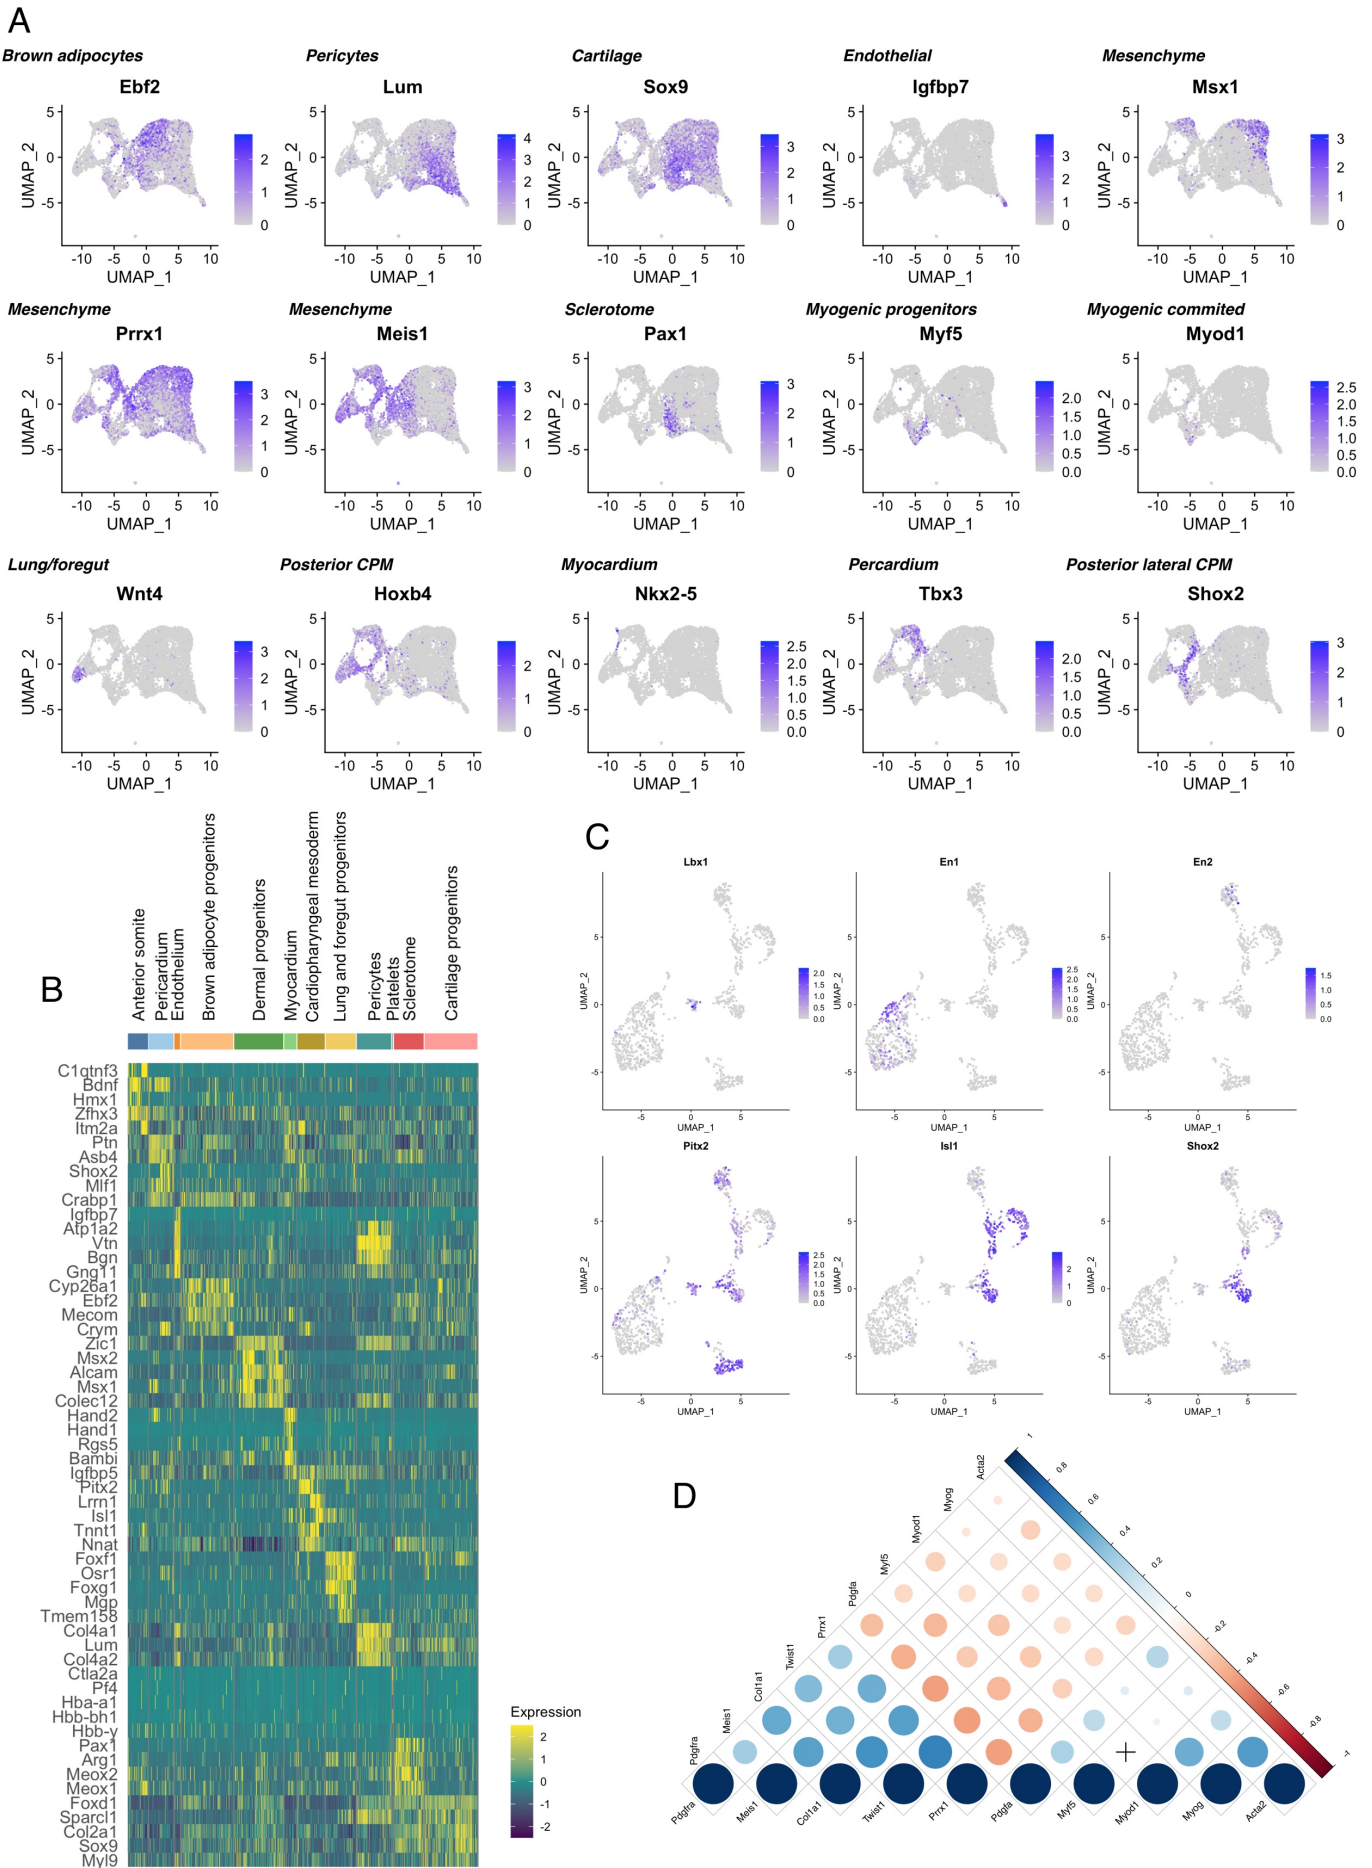

**Supplemental Figure S2. Myogenic and non-myogenic markers define anterior mesodermal tissues.**

A) *Mesp1*<sup>Cre/+</sup>;*R26*<sup>mTmG/+</sup> E10.5 UMAP expression plots of markers of various mesodermal lineages.

B) Heatmap of top 5 markers of each cluster of *Mesp1*<sup>Cre/+</sup>;*R26*<sup>mTmG/+</sup> E10.5.

C) UMAP expression plot of the *Mesp1*<sup>Cre/+</sup>;*R26*<sup>mTmG/+</sup> E10.5 subset. *En2*: marker of pharyngeal arch 1 (Knight et al., 2008), *En1*: marker of epaxial somitic progenitors (Cheng et al., 2004), *Lbx1*: marker for tongue progenitors (Gross et al., 2000), *Isl1*: marker of cardiopharyngeal mesoderm of pharyngeal arch 2-6 (Comai et al., 2019), *Shox2*: marker of caudal cardiopharyngeal mesoderm (Wang et al., 2020), *Pitx2*: marker of the extraocular region (Zacharias et al., 2010).

D) Pearson correlation plot of myogenic (*Pdgfra*, *Myf5*, *Myod1*, *Myog*, *Acta2*) and non-myogenic (*Pdgfra*, *Prrx1*, *Meis1*, *Twist1*, *Osr1*, *Col1a1*) genes. The size of the dots is inversely proportional to their p-value. A cross indicates a p-value higher than 0.05. The color of the dots indicates the strength of the a positive (blue) or negative (red) correlation.

## Figure S3

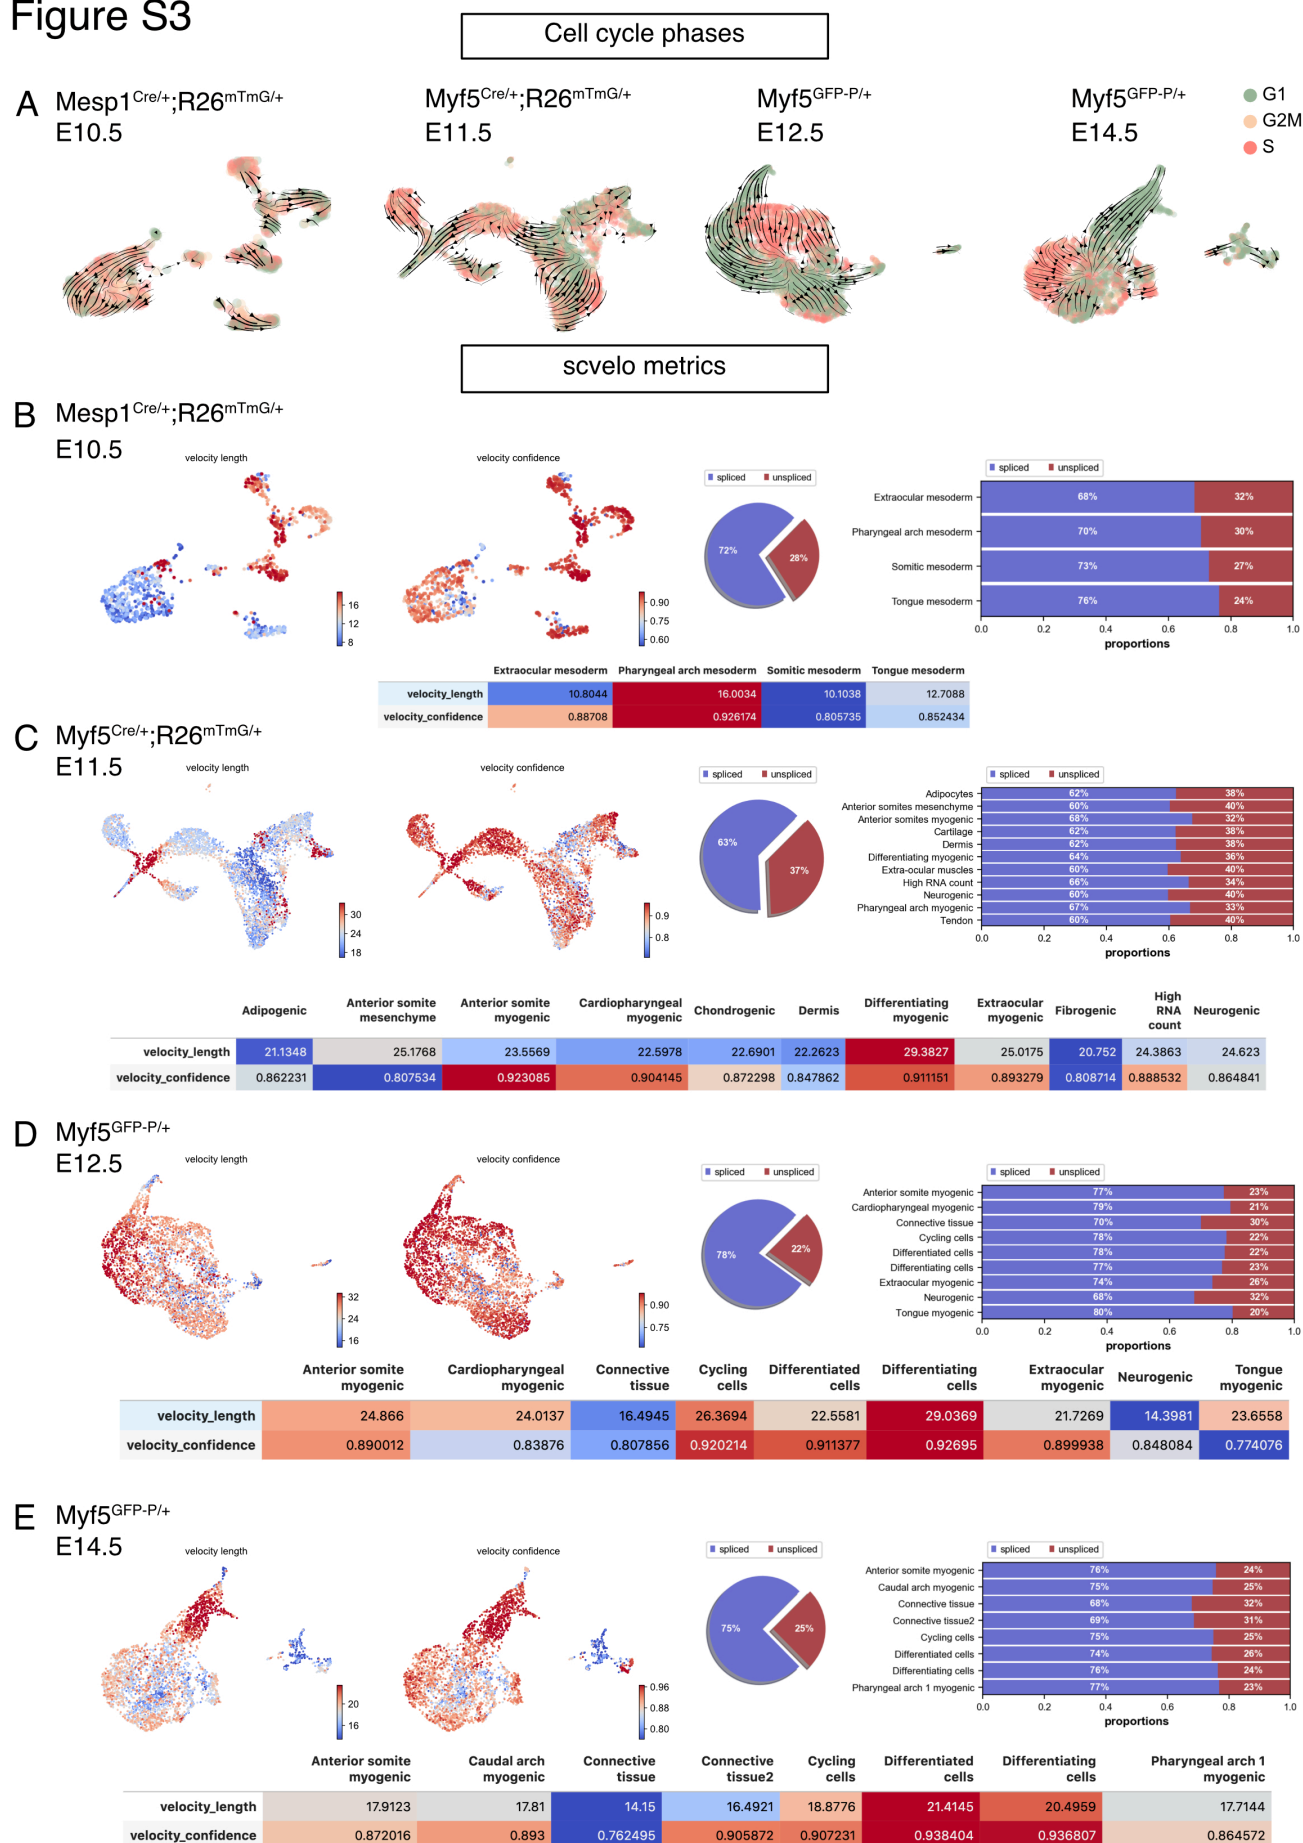

**Supplemental Figure S3. Cell cycle phases and scvelo metrics.**

A) UMAP of each dataset with overlaid velocity and cell cycle phase.

B-E) Quality control metrics of scvelo, including velocity length, velocity confidence and spliced/unspliced abundance per dataset and cell type.

## Figure S4

A

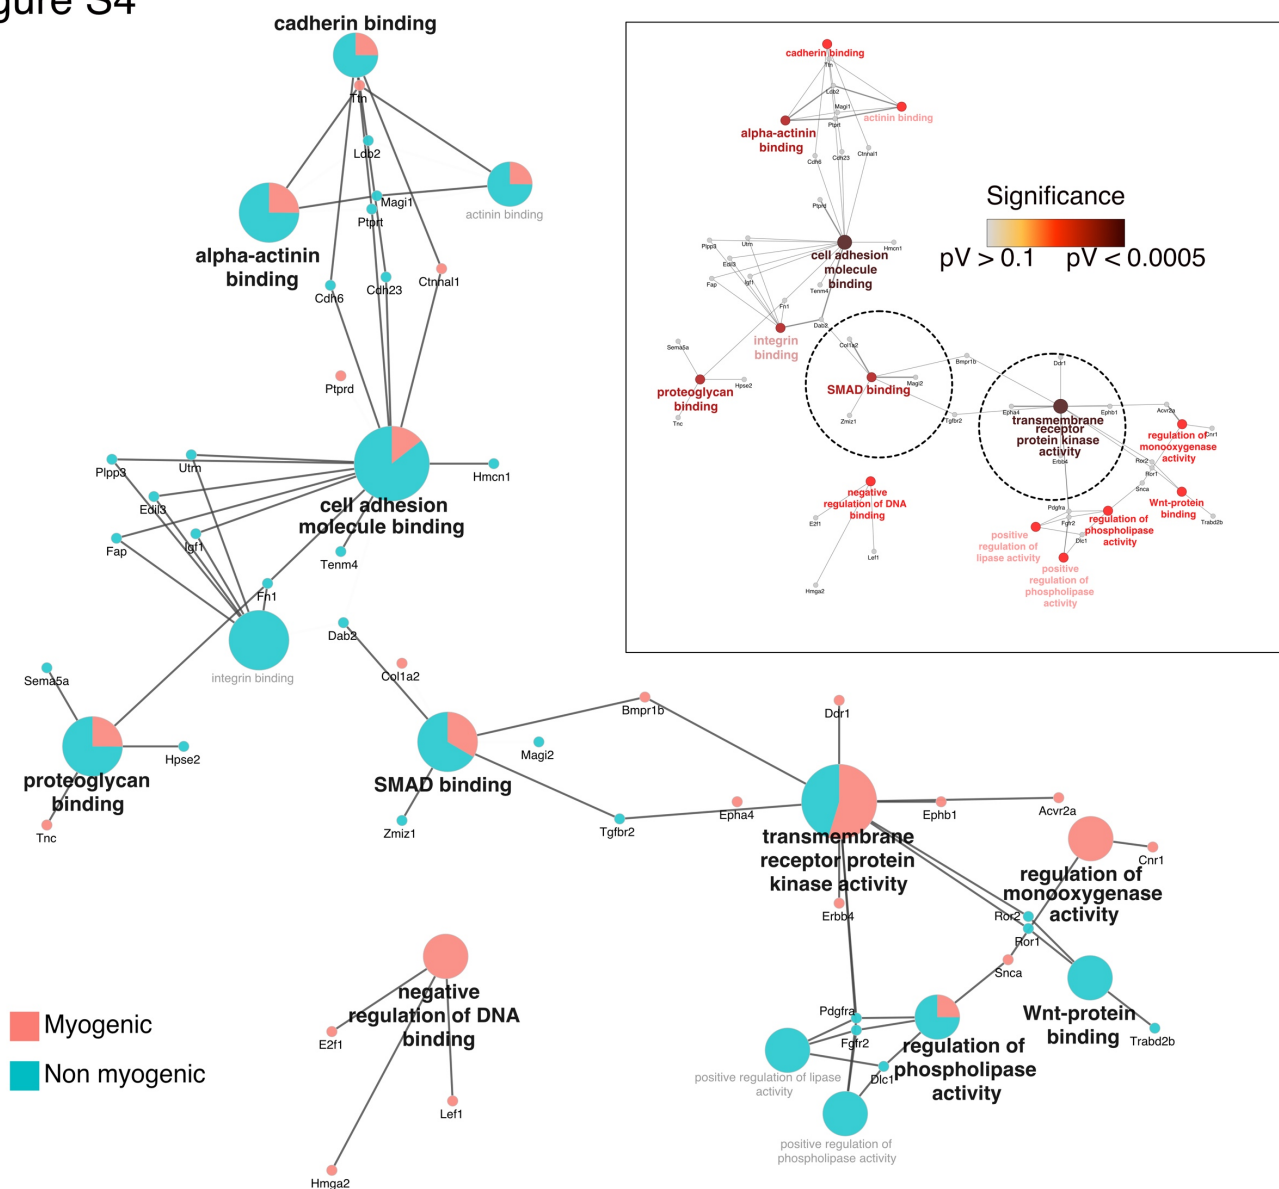

B

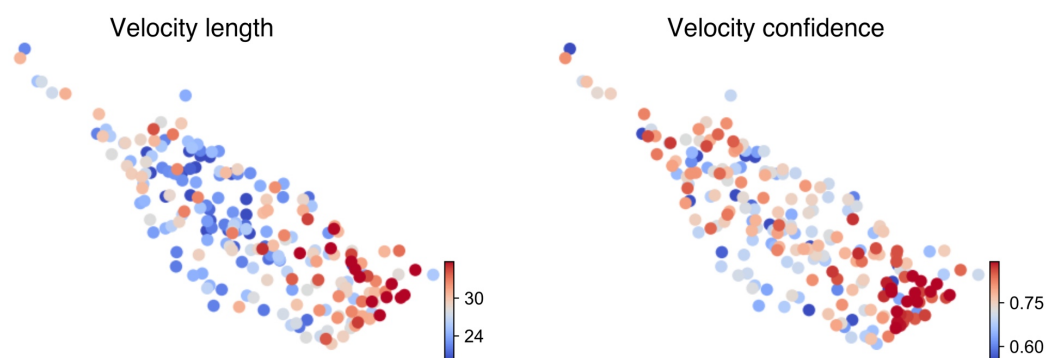



**Supplemental Figure S4. EOM non-myogenic cells arise from a myogenic compartment and crosstalk with myogenic cells.**

A) GO Molecular Function network, including relative contribution of each cluster to the term and significance levels. Insert show the significance of each term.

B) UMAP of *Myf5<sup>Cre/+</sup>; R26<sup>mTmG/+</sup>* E11.5 EOM illustrating velocity confidence and velocity length. Higher confidence is found on both ends of the EOM cluster.

Figure S5

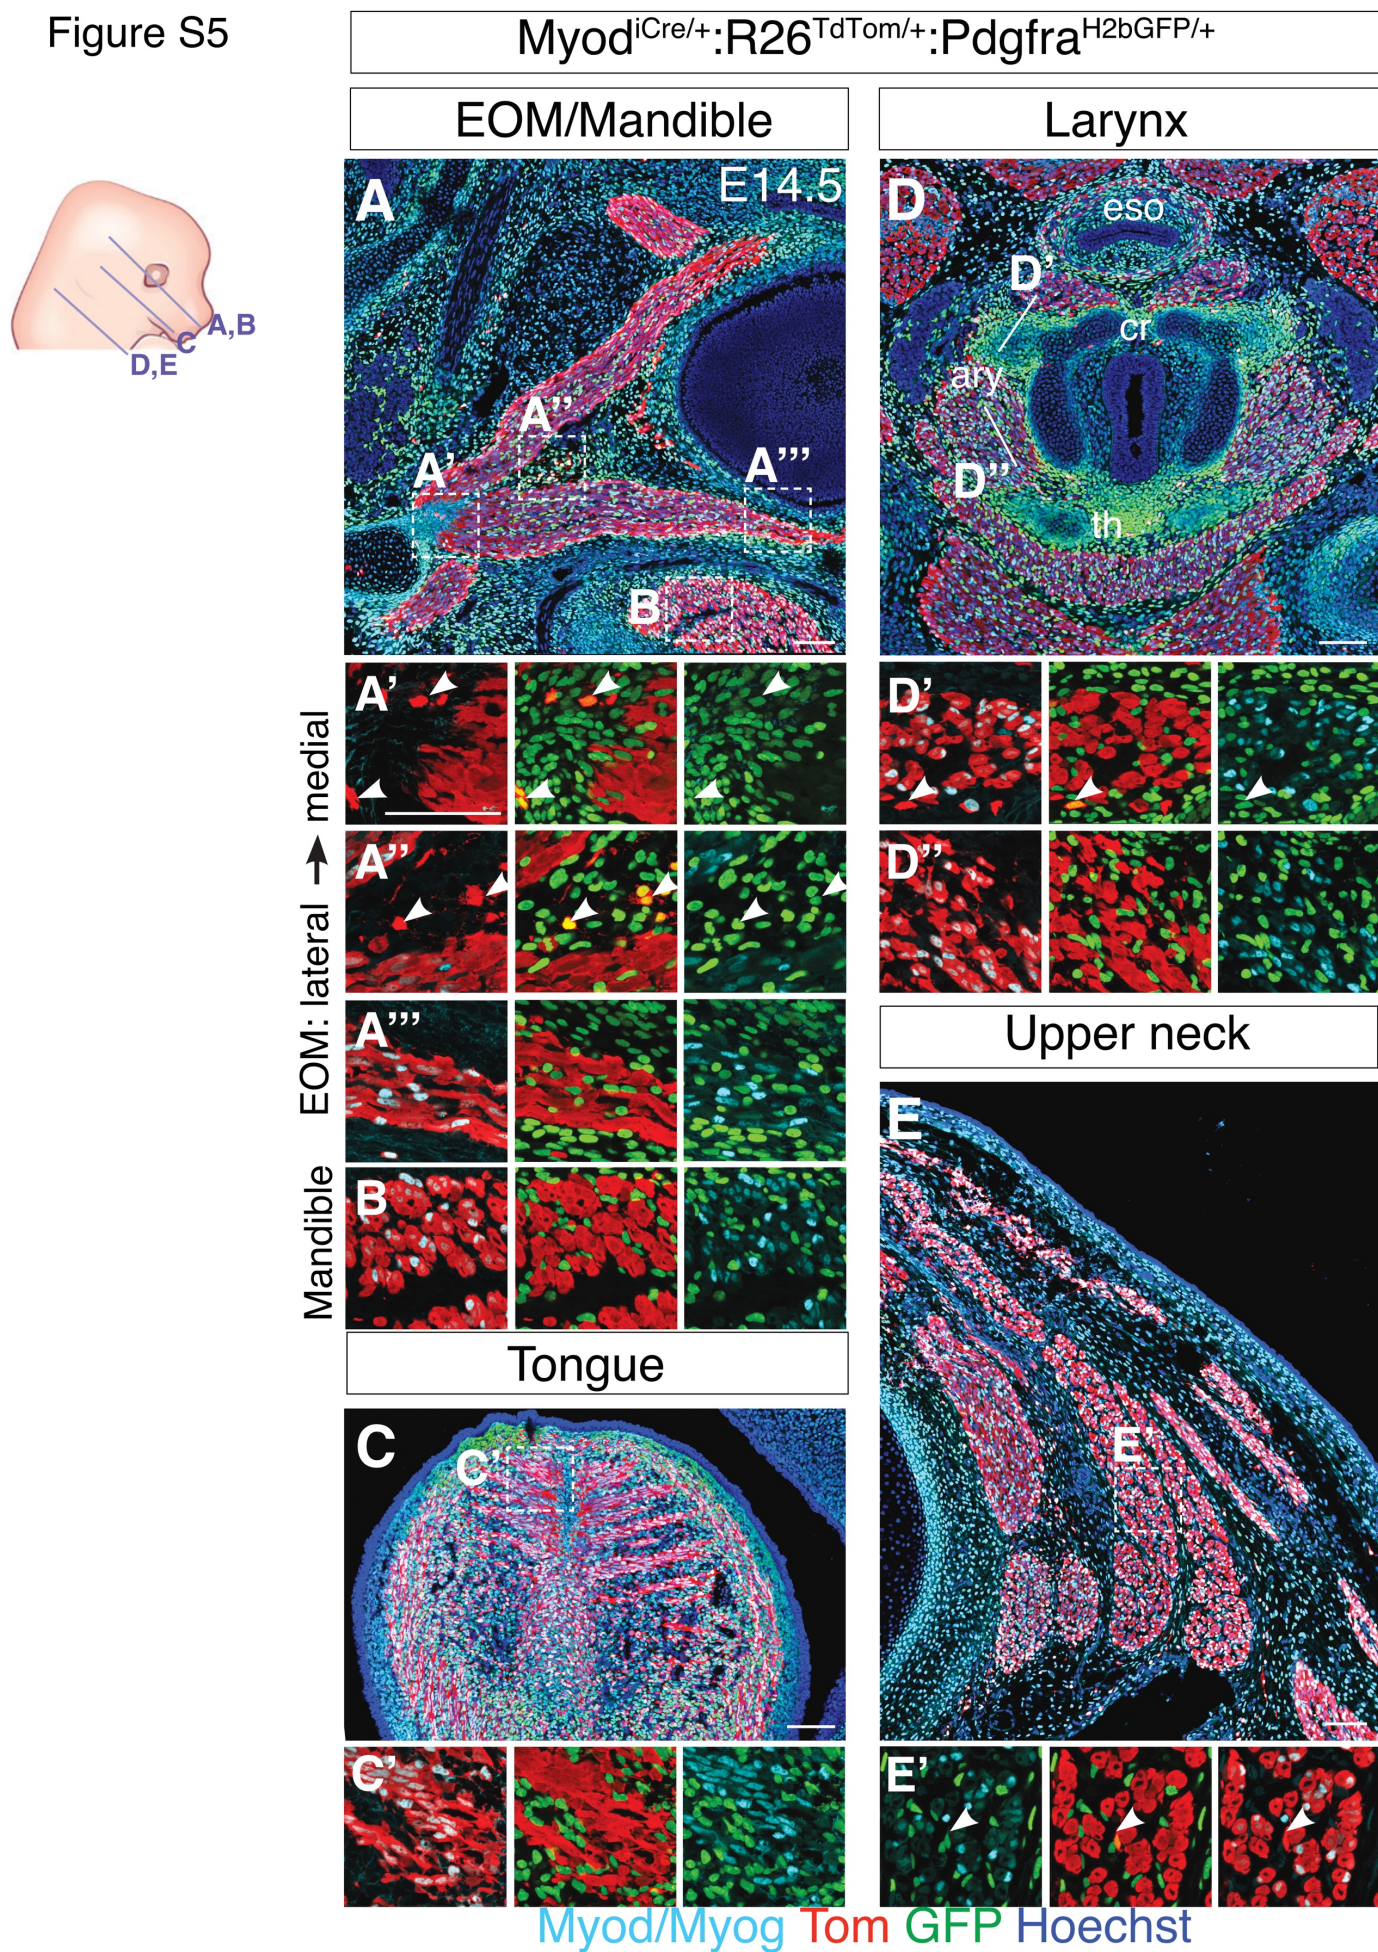

**Supplemental Figure S5. Myod+ cells are restricted to a myogenic fate.**

A-E) Transverse sections of *Myod*<sup>fCre/+</sup>; *R26*<sup>TdTomato/+</sup>; *Pdgfra*<sup>H2BGFP/+</sup> embryos at E14.5 immunostained for Myod/Myog (committed and differentiating myoblasts) in the extraocular (A), mandibular (B), laryngeal (C), tongue (D) and upper neck (E) regions. White arrowhead indicates rare double positive cells (GFP+/Tom+).

Figure S6

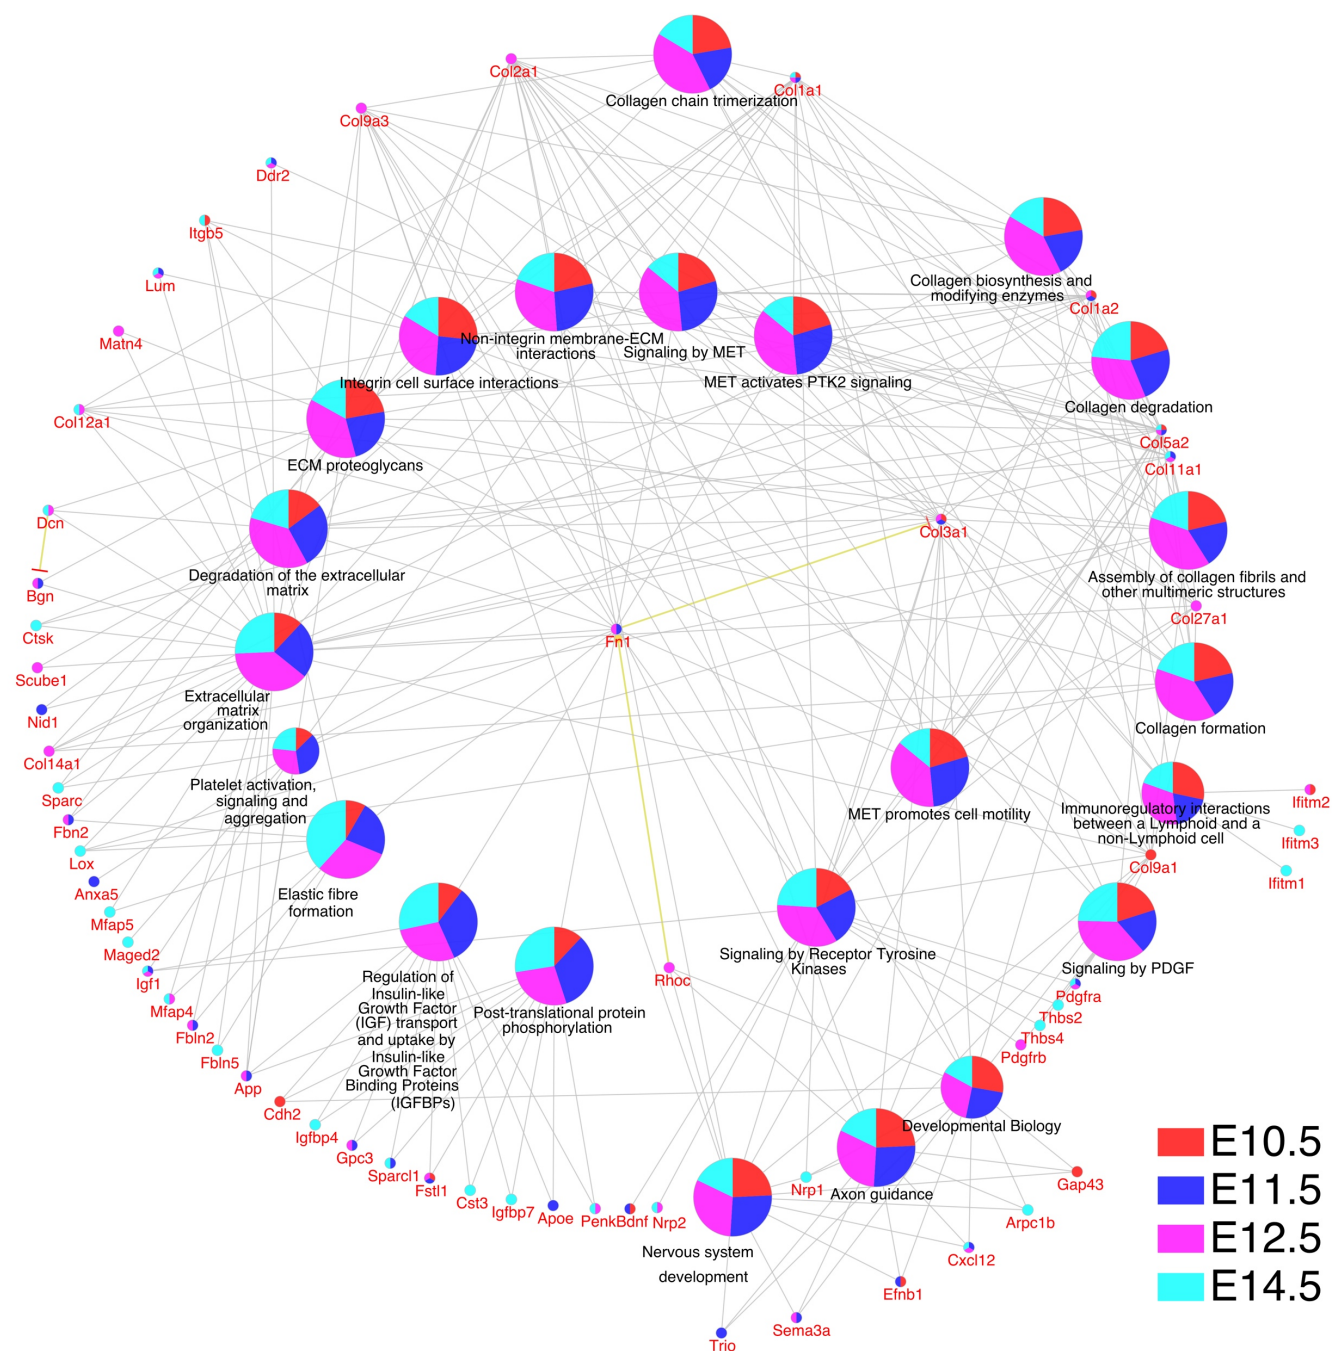

**Supplemental Figure S6. Non-myogenic Myf5-derived cells display a similar gene ontology.**

Gene ontology analysis for Reactome pathways, including genes underlying each term, and their representation in each dataset. Specific genes of each stage appear related.

Figure S7

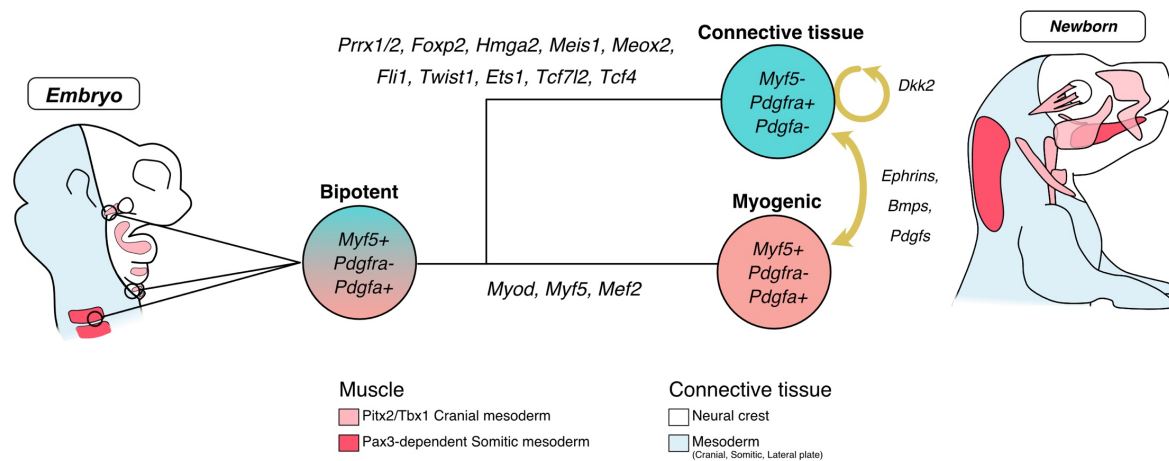

**Supplemental Figure S7. Model of Myf5+ bipotent progenitors giving rise to muscle and associated connective tissues.**

Model for bipotent Myf5+/Pdgfa+ progenitors giving rise to myogenic and non-myogenic cells and discrete parts of the head, deprived of neural crest. Upon activation of a set of transcription factors including Prrx1/2, Foxp2, Hmga2, Meis1, Meox2, Fli1, Twist1, Ets1, Tcf7l2 and Tcf4, a fibrogenic fate is acquired. A molecular dialogue is initiated at the branchpoint including extracellular matrix components and tyrosine kinase signalling such as Pdgf, Ephrins and Bmps. The non-myogenic fate is maintained cell-autonomously by a canonical Wnt positive feedback loop.

| E10.5 Anterior somites | E11.5 EOM Myogenic | E11.5 EOM Non-myogenic | E12.5 Non-myogenic | E14.5 Non-myogenic |
|------------------------|--------------------|------------------------|--------------------|--------------------|
| Tshz2                  | Ccdc141            | Zfpn2                  | Mgat4c             | Dnm1               |
| Eya1                   | Mcm6               | Ptxna4                 | Cenpv              | Pid1               |
| C1qtnf3                | Dync1i1            | Col23a1                | C130073E24Rik      | Nrp2               |
| Meis2                  | Tpm2               | Edil3                  | Tbx3os1            | Ntrk3              |
| Limch1                 | Celf2              | Map2                   | E330013P04Rik      | Tmem132c           |
| Moxd1                  | Sox6               | Rora                   | Stk26              | Egflam             |
| Epha4                  | Tnc                | Sema5a                 | Edil3              | Gpr153             |
| Pitx2                  | Magi3              | Colec12                | Fdft1              | Efemp1             |
| Parm1                  | Sh3glb1            | Smoc1                  | Lima1              | Adams2             |
| Hpse2                  | Parm1              | Ptpst                  | Trim59             | Brinp1             |
| Lrm1                   | Ephb1              | Ror1                   | Meg3               | Vegfc              |
| Dmrt2                  | Bmpr1b             | Dock5                  | Gins3              | Twist2             |
| Myf3                   | Hells              | Map1b                  | Tpm2               | Itgb5              |
| Fap                    | Pdgfc              | Fn1                    | Cdh6               | Gria1              |
| Hs6st2                 | Ptprd              | Limch1                 | Csmd3              | Sned1              |
| Ddr2                   | Cnr1               | Tenm4                  | Tceal5             | Sorcs3             |
| Cald1                  | Sema3d             | Rbms3                  | Pclaf              | Ebf2               |
| Prx1                   | Clcn5              | Srgap3                 | Tspan9             | Fam19a1            |
| Magi3                  | Chd7               | Tmem132c               | Eps8               | Trabd2b            |
| Ntn1                   | Col25a1            | Sdc2                   | Lmna               | Plxdc2             |
| Zfx3                   | Reep1              | Add3                   | Dmrt2              | Sh3gl3             |
| Meis1                  | Cttna1             | Pdgfra                 | Cpeb4              | Luzp2              |
| Tnni1                  | Tpm1               | Gmcs                   | Hpgd               | Pdzd2              |
| Crym                   | Zim1               | St6galnac3             | Rcsd1              | Sema3e             |
| Ebf1                   | Lmx1a              | Epb41l3                | Pdgfra             | Rims1              |
| Nr2f1                  | Neb                | Pde3a                  | Plac1              | Epha3              |
| Ntng1                  | Atad2              | Tox                    | Palmd              | Cyp7b1             |
| Pgm5                   | Dapk2              | Smarca2                | Gucy1a1            | Gem                |
| Cdh6                   | Prox1              | Ctdspl                 | Wif1               | Ldb2               |
| Foxp1                  | Lsamp              | Magi2                  | Naalad2            | Scube1             |
| Celf2                  | Ttn                | Dpysl3                 | Smoc2              | Pdgfra             |
| Tbx1                   | Pls3               | Fgfr2                  | Rassf4             | Pde1a              |
| Bdnf                   | Slf2               | Ldb2                   | Pttg1              | Nde1               |
| Colec12                | Vat1l              | Igf1                   | Josd2              | Enpp2              |
| Eya4                   | E2f1               | Elk3                   | Ptxna4             | Fam107b            |
| Sobp                   | Epb41l2            | Zmiz1                  | Eya2               | Sbxp6              |
| Peg3                   | Gm28653            | Dlc1                   | Nrsn1              | Rerg               |
| Pdgfra                 | Lrm1               | Nhs                    | Fign               | Prex2              |
| Nrk                    | Mef2c              | Cdkn1c                 | Inpp1              | Man1a              |
| Ptn                    | St8sia2            | Plpp3                  | Rnf152             | Tmem45a            |
| Daam1                  | Tshz1              | Ebf1                   | Lasp1              | Sh3bp4             |
| Dlk1                   | Wee1               | Sorbs2                 | Mlrn               | Mcc                |
| Unc5c                  | Slc24a3            | Baz1a                  | Cdt1               | Ncald              |
| Lpar1                  | Ncoa1              | Fat4                   | Notch3             | Kdelr2             |
| Syne2                  | Dek                | Golgb1                 | Pax3               | Pcdh19             |
| Nkd2                   | Kdm5b              | Hpse2                  | Egfr               | Gas7               |
| Brinp1                 | Unc13c             | Samd4                  | Dbf4               | Cpt1c              |
| Zfx4                   | Ddr1               | Itga9                  | Bcr                | Adam22             |
| Nnat                   | Pip4k2a            | Magi1                  | Mlit3              | Itgb8              |
| Gxytl2                 | Fndc3c1            | Pcdh9                  | Nectin1            | Dchs2              |
| Cimp                   | Rbm24              | Tgfb2                  | Grin3a             | Cep350             |
| Ror2                   | Rreb1              | Ntf3                   | Cbfa2t3            | Oat                |
| Nfia                   | Rragd              | Col11a1                | Cdh2               | Rab30              |
| Ebf2                   | Acsl3              | Runx1t1                | Anln               | Aff2               |
| Ednra                  | Acvr2a             | Tnrc18                 | Ccdc6              | Gna14              |
| Fli1                   | Zeb1               | Crym                   | Mcu                | Slc29a1            |
| Tspan12                | Rgma               | Fap                    | Fnip2              | Pls3               |
| Ttc28                  | Arpp21             | Ppp1r1a                | Kcnk13             | Traf3ip1           |
| Nfib                   | Lef1               | Tes                    | Sned1              | Rcsd1              |
| Ccdc88c                | Nr2f2              | Bicc1                  | Nde1               | Lgr4               |
| Col13a1                | Foxo1              | Il1rap1                | Hipk3              | Zfp9               |
| 2700069118Rik          | Pdzm4              | Alcam                  | Arhgap11a          | Hs3st5             |
| Pcolce                 | Hmga2              | 2700069118Rik          | Fam8a1             | Aspn               |



| E10.5 Anterior somites | E11.5 EOM Myogenic | E11.5 EOM Non-myogenic | E12.5 Non-myogenic | E14.5 Non-myogenic |
|------------------------|--------------------|------------------------|--------------------|--------------------|
| Scn3a                  | Lurap1l            | Dab2                   | Kif21a             | Nrxn1              |
| Acvr2a                 | Pkip               | Cntln                  | Mtss1              | Rrm1               |
| Auts2                  | Ncl                | Clmn                   | Abcd2              | Igfbp7             |
| Col3a1                 | CT025619.1         | Rbms1                  | Irx5               | Slc35f3            |
| Gap43                  | Erbp4              | Tmem2                  | Pacs2              | Kif15              |
| Mrln                   | Cdk14              | Cdh6                   | Nab1               | Slc1a3             |
| Pax3                   | Kif21a             | Lypd6                  | Ccnd2              | Bmp6               |
| Sim1                   | Zfp704             | Mmp2                   | Bok                | Dkk2               |
| Epb41l2                | Nasp               | Kif5c                  | Dok5               | Tspan9             |
| Ppp3ca                 | Plekha5            | Cadm2                  | Ncapg              | Ets1               |
| Tnfrsf6                | Cap2               | Prkg2                  | Rfx8               | Gria3              |
| Tmem132c               | Snca               | Cped1                  | Fhod3              | Sox8               |
| Tmem2                  | Epha4              | Dtl                    | Tk1                | Melk               |
| Epb41l3                | Atad5              | Ror2                   | Asf1b              | Ntm                |
| Crybg3                 | Cntn3              | Utrn                   | Tek                | Synpo2l            |
| Nrxn1                  | Cacna2d1           | Foxp1                  | Arfgef3            | Hlf                |
| Farp1                  | Pak3               | L3mbtl3                | Rnf182             | Adamts5            |
| Sulf1                  | Megf10             | Cdh23                  | Kif14              | Plcb4              |
| Tmtc2                  | Tnnt1              | Negr1                  | 1810041L15Rik      | Cdc25b             |
| Pde4dip                | Acta2              | Hmcn1                  | Rrm2               | Mgat4a             |
| Phldb2                 | Barx2              | Col26a1                | Fgf5               | Mdfic              |
| Plpp3                  | Mrln               | Fbn2                   | Barx2              | Trpc5              |
| Ybx3                   | Pgm5               | Ankrd12                | Fli1               | Kif4               |
| Ppm1l                  | Fmr1               | Lhfp                   | Jph2               | Pice1              |
| Twist2                 | Smc4               | Hs3st3b1               | Dtx4               | Il17rd             |
| Nuak1                  | Cimp               | Adgrl3                 | Ncald              | Mmp16              |
| Tgfb2                  | Alpk2              | Svil                   | Zic4               | Hhip               |
| Sfrp1                  | Kctd1              | Mob3b                  | Dlc1               | Tpx2               |
| Sncaip                 | Meg3               | Trabd2b                | Cdc45              | Ndc80              |
| Tenm3                  | Samd5              | Rmst                   | Gatm               | Bub1b              |
| Cdh2                   | Nrk                | Prr1                   | Ssc5d              | Hmmr               |
| Iqgap2                 | Piezo2             | 5330434G04Rik          | Phactr2            | Kank4              |
| App                    | Robo1              | Zfx3                   | Ppp1r14c           | Tmeff2             |
| Pgam2                  | Col1a2             | Foxp2                  | Agl                | Nr4a1              |
| Rspo3                  | Cntrl              | Mpp6                   | Tox3               | Aurkb              |
| Cdon                   | Mlt3               | Crispld1               | Aurka              | Lrrtm3             |
| Ebf3                   | Peg3               | Eya1                   | Cdh15              | Cenpq              |

**Table 1: Driver genes underlying cell fate decision in each dataset.**

|         | E10.5 | E11.5 | E12.5 | E14.5 |
|---------|-------|-------|-------|-------|
| Foxp2   | (+)   | (+)   | (+)   | (+)   |
| Hmga2   | (+)   | (+)   | (+)   | (+)   |
| Meis1   | (+)   | (+)   | (+)   | (+)   |
| Meox2   | (+)   | (+)   | (+)   | (+)   |
| Tcf7l2  | (+)   | (+)   | (+)   | (+)   |
| Fli1    | (+)   | (+)   | (+)   | (-)   |
| Lef1    | (-)   | (+)   | (+)   | (+)   |
| Prrx1   | (+)   | (+)   | (-)   | (+)   |
| Prrx2   | (-)   | (+)   | (+)   | (+)   |
| Six2    | (+)   | (+)   | (+)   | (-)   |
| Creb3l1 | (-)   | (+)   | (-)   | (+)   |
| Ebf1    | (+)   | (-)   | (+)   | (-)   |
| Ets1    | (-)   | (+)   | (-)   | (+)   |
| Foxp4   | (+)   | (+)   | (-)   | (-)   |
| Hoxb3   | (-)   | (+)   | (+)   | (-)   |
| Klf6    | (-)   | (+)   | (-)   | (+)   |
| Nfatc4  | (-)   | (+)   | (-)   | (+)   |
| Nfib    | (-)   | (+)   | (+)   | (-)   |
| Pax7    | (-)   | (-)   | (+)   | (+)   |
| Pbx1    | (-)   | (+)   | (-)   | (+)   |
| Rreb1   | (-)   | (-)   | (+)   | (+)   |
| Tbx15   | (+)   | (+)   | (-)   | (-)   |
| Tcf4    | (+)   | (-)   | (+)   | (-)   |
| Twist1  | (+)   | (+)   | (-)   | (-)   |
| Zic4    | (+)   | (-)   | (+)   | (-)   |
| Zmiz1   | (-)   | (+)   | (+)   | (-)   |
| Ar      | (-)   | (-)   | (-)   | (+)   |
| Arid5b  | (-)   | (-)   | (+)   | (-)   |
| Atf3    | (-)   | (-)   | (-)   | (+)   |
| Chd2    | (+)   | (-)   | (-)   | (-)   |

**Table 2: Driver regulators of non-myogenic fate in each dataset.**

(+): Present, (-): Absent.
